1 **Multiple paths lead to salt tolerance - pre-adaptation vs dynamic responses**  
2 **from two closely related extremophytes**

3

4 Kieu-Nga Tran<sup>1</sup>, Guannan Wang<sup>1</sup>, Dong-Ha Oh<sup>1</sup>, John C. Larkin<sup>1</sup>, Aaron P. Smith<sup>1</sup>, Maheshi  
5 Dassanayake<sup>1\*</sup>

6

7 <sup>1</sup>Department of Biological Sciences, Louisiana State University, Baton Rouge, LA 70803, USA

8 \*Address correspondence to: maheshid@lsu.edu

9

10 **Keywords:** Extremophyte, *Schrenkiella parvula*, *Eutrema salsugineum*, omics, convergent  
11 response, pre-adaptation, stress-preparedness, dynamic response

12

13 **Abstract**

14 Salt tolerance is a complex trait with much of the underlying genetic variation and  
15 integrated response strategies yet to be discovered from stress adapted plants. *Schrenkiella*  
16 *parvula* and *Eutrema salsugineum* are salt-tolerant extremophytes related to *Arabidopsis*  
17 *thaliana* in Brassicaceae. We investigated their response strategies contrasted against the salt-  
18 sensitive model, *A. thaliana* to cope with salt stresses via transcriptomic, metabolomic, and  
19 ionic adjustments. The extremophytes exemplified divergent routes to achieve nutrient  
20 balance, build osmotolerance, boost antioxidant capacity, and extend transcriptomic support  
21 for modified ion transport and stress signaling. Those led to similar molecular phenotypes  
22 adapted to salt stress in the extremophytes, absent in *A. thaliana*. The predominant  
23 transcriptomic signals in all three species were associated with salt stress. However, root  
24 architecture modulation mediated by negative regulation of auxin and ABA signaling supported  
25 minimally-affected root growth unique to each extremophyte during salt treatments. Overall, *E.*  
26 *salsugineum* exhibited pre-adapted responses at the metabolome level, whereas *S. parvula*  
27 showed dynamic metabolomic responses coupled to a pre-adapted transcriptome to survive  
28 salt stress. Our work shows that the two extremophytes share common salt tolerance features,  
29 but differ substantially in pathways leading to the convergent, adaptive traits.

## 30 Introduction

31 Plants differ greatly in their tolerance to salt stress and there is a metabolic cost for  
32 adaptation to salt stress, reflected by differences in growth and yield when grown in high saline  
33 soils<sup>1,2</sup>. Approximately 2% of angiosperms are adapted to grow in high saline environments  
34 while the remaining 98%, including most crop plants, are highly sensitive to salt stress<sup>3,4</sup>.  
35 Previous studies have largely used salt-sensitive model plants or crops to understand genetic  
36 mechanisms underlying salt tolerance. Consequently, we understand more about functional  
37 aspects of individual genes or more specifically their maladapted variants and how they  
38 function in genomic backgrounds sensitive to salinity stress. However, insights from  
39 comparative studies using salt-tolerant extremophytes contrasted with a salt-sensitive model  
40 offer a promising prospect for discovery of evolutionarily successful tolerance mechanisms that  
41 are absent or underdeveloped in the salt-sensitive plants<sup>5,6</sup>. This allows us to rethink the  
42 functional space of genes and their influence on co-regulated pathways leading to salt  
43 tolerance unexplored before.

44 Excess salt exerts osmotic, oxidative, ionic, and water-deficit stresses<sup>7-9</sup>. Multiple  
45 genetic mechanisms mediated by ABA-dependent as well as ABA-independent pathways have  
46 been shown to modulate salt stress responses in *A. thaliana*, all major crops, and selected  
47 halophytes<sup>8,10,10,11</sup>. These studies collectively support the view that salt stress-adapted plants  
48 show a highly coordinated response to survive salt stress that requires synergistic coordination  
49 between root and shoot responses. Despite the complexity of adapting to salt stress at the  
50 whole plant level, angiosperm lineages have evolved this complex trait repeatedly<sup>12,13</sup>.  
51 Therefore, it is one of the main complex traits studied for convergent evolution in plants.  
52 Despite the significant body of work on salt stress adaptation in plants, we still have a large gap  
53 in understanding which pathways synergistically act to achieve salt stress adaptation, and how  
54 a common set of orthologs from closely related plants mediate this adaptation<sup>14</sup>.

55

56 *Schrenkiella parvula* and *Eutrema salsugineum* (Brassicaceae) are two leading  
57 extremophyte models equipped with foundational genomic resources which facilitate  
58 comparative studies with *Arabidopsis thaliana*<sup>6,15,16</sup>. These extremophytes show remarkable

59 salt resilient growth even at salinities reaching seawater strengths <sup>6,17,18</sup>. While *S. parvula* is  
60 found near salt lakes in the Irano-Turanian region <sup>4,19</sup>, *E. salsugineum* has a wider distribution  
61 from coastal to inland saline fields in the northern temperate to sub-arctic regions <sup>20</sup>. Despite  
62 several studies highlighting metabolomic and transcriptomic responses of these extremophytes  
63 to salt stress <sup>20-24</sup>, molecular mechanisms determining how they have convergently achieved  
64 salt adapted growth remains unknown.

65 In this study, we used a multi-omics experimental design integrating transcriptomics,  
66 metabolomics, and ionomics to investigate the coordinated cellular responses and the  
67 associated genetic mechanisms employed by *S. parvula*, *E. salsugineum*, and *A. thaliana* to  
68 survive salt stress at variable success levels. We examined the spatio-temporal coordination of  
69 multiple genetic pathways used by the three models at different salt stress intensities. Both  
70 extremophytes showed distinct molecular phenotypes suggesting induction of complementary  
71 cellular processes that used core pathways present in all plants, but with modifications to those  
72 in ways that optimized balance between stress tolerance and growth.

73

## 74 **Results**

75 Previous studies using either *S. parvula* or *E. salsugineum* in a comparative study with *A.*  
76 *thaliana* have successfully used 150 mM NaCl to elicit salt stress responses in the extremophyte  
77 while avoiding induction of immediate tissue necrosis in *A. thaliana* in the short term <sup>6</sup>. We  
78 grew *S. parvula*, *E. salsugineum*, and *A. thaliana* hydroponically for 28 days; then transferred  
79 them to a medium supplemented with 150 mM NaCl for comparative studies including *A.*  
80 *thaliana* (Figure S1A). *Arabidopsis thaliana* did not show severe stress symptoms until four days  
81 of exposure to salt. Therefore, we decided to capture the short-term effects of salt at 0, 3, 24,  
82 and 72 hr after salt treatment to include timepoints that would precede the onset of stress  
83 phenotypes (Figure S1). Additionally, for the extremophytes, 250 mM NaCl was used to further  
84 examine their salt stress responses. We used the initial three timepoints to detect immediate  
85 responses of the ionome and the transcriptome to salt and used 0 hr and the latter two  
86 timepoints to detect the subsequent metabolome alterations (Figure S1B).

87

## 88 **High tissue tolerance to Na accumulation vs limiting Na accumulation within tissues**

89 All three species accumulated Na as the duration of the treatment or the concentration  
90 of NaCl increased (Figure 1A). *Arabidopsis thaliana* shoots showed a 19-fold increase of Na  
91 compared to control within 3 hours of exposure to salt. It accumulated more Na in shoots than  
92 in roots and did not limit Na accumulation in roots as much as *S. parvula*. Tissue accumulation  
93 of Na was lowest in *S. parvula* compared to the other two species. Interestingly, *E. salsugineum*  
94 allowed higher Na accumulation in both roots and shoots compared to *S. parvula*, at levels  
95 similar to those observed for *A. thaliana* roots under salt stress (Figure 1A). This suggests that *S.*  
96 *parvula* limited total Na accumulation in tissues while *E. salsugineum* showed high tissue  
97 tolerance to Na accumulation, a trend maintained for 250 mM NaCl treatments in the two  
98 extremophytes (Figure 1A).

99 High Na levels interfere with K and other nutrient uptake in plants (Munns and Tester,  
100 2008). We examined whether Na accumulation triggered nutrient imbalance in any of the test  
101 species by quantifying the abundance of 13 plant nutrients during salt treatments. The K level  
102 significantly dropped within 3 hr in *A. thaliana* roots, but did not change in either  
103 extremophyte, regardless of the duration and intensity of the Na treatments (Figure 1B). In  
104 shoots, we did not observe any significant changes in K levels by salt treatments in any of the  
105 three species. When we examined the profiles of all quantified nutrients, shoots exhibited  
106 minimal changes in response to salt stress compared to roots (Figure 1C). Intriguingly, *A.*  
107 *thaliana* roots showed significant depletion of 6 out of 13 nutrients under salt treatments  
108 whereas both extremophytes showed minimal nutrient disturbances (Figure 1C and Table S1).  
109 We then examined nutrient compositions in the control samples (basal levels) to identify  
110 nutrients preferentially enriched in any of the species (Figure 1D and Table S1). Notably, Ca and  
111 Mg, which are known to regulate specificity of Non-Selective Cation Channels (NSCCs)<sup>25</sup>, were  
112 found at higher basal levels in *S. parvula* roots compared to other species. Similarly, Cu and Co  
113 were high in *E. salsugineum* whereas Fe, P, K, and Mo were high in *A. thaliana*.

114

115 **Primary metabolite pools decreased from high basal levels in *E. salsugineum* but increased**  
116 **from low basal levels in *S. parvula* upon salt treatments**

117 Salt stress requires metabolic adjustments in plants <sup>7</sup>. Therefore, we examined the  
118 metabolite adjustment strategies of the two extremophytes in comparison to salt-sensitive *A.*  
119 *thaliana*. We quantified a total of 716 metabolites using GC-MS for each species (see Methods),  
120 of which 182 with known specific identities were referred to as “known metabolites” while the  
121 remaining were collectively referred to as “unknown metabolites” in this study (Table S2). The  
122 overall quantified metabolite pool in roots showed a relatively strong correlation in metabolite  
123 abundance between selected pairwise comparisons resulting in two distinct trends (Figure 2A).  
124 First, the control groups of *S. parvula* and *A. thaliana* exhibited the highest pairwise correlation,  
125 and this correlation decreased as the duration of salt treatment increased (Figure 2A, upper  
126 panel). Second, *S. parvula* and *E. salsugineum* profiles were moderately correlated at control  
127 conditions, but upon salt treatments, this correlation became stronger, indicating that the  
128 majority of metabolites in the extremophytes adjusted to similar levels in the roots. At 150 mM  
129 NaCl, this increase in correlation between *S. parvula* and *E. salsugineum* was only apparent at  
130 72 hr, but at the higher NaCl concentration of 250 mM, their root metabolite profiles were  
131 strongly correlated even at 24 hr (Figure 2A, lower panel). In contrast to roots, the shoot  
132 metabolomes of *S. parvula* and *E. salsugineum* remained divergent following salt treatments  
133 (Figure S2A).

134 Under salt treatments, metabolite abundances in both *A. thaliana* and *E. salsugineum*  
135 roots largely decreased while *S. parvula* metabolite abundances increased (Figure 2B). This  
136 trend for *S. parvula* was not upheld in shoots, where metabolite abundances in all three species  
137 predominantly decreased (Figure S2B). We next examined if the dynamically changing  
138 metabolites were categorically associated with sugars and amino acids often known for their  
139 roles as organic osmolytes (Slama et al., 2015). Figure 2C shows percent abundance among the  
140 three species at control levels in roots, for all sugars, amino acids, and their immediate  
141 derivatives (see Methods) quantified in our study that showed a significant difference in  
142 abundance among the three species. Even before the salt treatment, *E. salsugineum* had  
143 accumulated much higher levels for most of these metabolites than the other species. For  
144 instance, the abundance of sucrose in *E. salsugineum* accounted for 98.6% of the combined  
145 sucrose abundance in the roots of all three species (Figure 2C) and this was 155- and 131-fold

146 higher than that in *A. thaliana* and *S. parvula*, respectively (Table S2). Similarly, glucose,  
147 raffinose, fructose, and proline were more abundant in *E. salsugineum* compared to the other  
148 species (Figures 2C and Table S2).

149 We checked whether one extremophyte maintained a higher basal abundance for key  
150 metabolites associated with osmoregulation while the other extremophyte actively induced  
151 those when exposed to salt, eventually converging to a metabolic status distinct from that of *A.*  
152 *thaliana* under salt stress in roots, as we observed in Figure 2A. We clustered abundance  
153 profiles of all known metabolites exhibiting significant changes in abundance at the basal level  
154 among the three species or in at least one stress condition in any species (Figure 2D). Two  
155 readily identifiable clusters (box outlined in Figure 2D) showed lower metabolite abundances in  
156 *A. thaliana* and control/150 mM-24 hr *S. parvula* samples compared to *E. salsugineum*, but  
157 each of those metabolites increased exclusively in *S. parvula* upon prolonged/higher salt  
158 treatment to match the constitutive high level found in *E. salsugineum*. These clusters were  
159 enriched in metabolites known for their role as osmoprotectants or antioxidants<sup>26</sup>, including  
160 sucrose, fructose, glucose, GABA, proline, and dehydroascorbic acid (full list in Table S3). These  
161 results indicate a basal level metabolic “preparedness” in *E. salsugineum* roots compared to  
162 active induction of many osmoprotectants and antioxidants in *S. parvula* when responding to  
163 salt treatments. On the other hand, *A. thaliana* lacks neither a preadapted- nor a dynamic-  
164 strategy found in the two extremophytes.

165

### 166 ***Arabidopsis thaliana* showed stronger transcriptomic responses compared to the** 167 **extremophytes during salt stress**

168 Previous studies have reported that nearly 20% of the *A. thaliana* transcriptome  
169 responds to salt stress<sup>21,23</sup>. We tested if the transcriptomic responses from *A. thaliana* aligned  
170 more with either extremophyte or if the extremophytes showed a largely overlapping response  
171 that was distinct from *A. thaliana*. The overall root and shoot transcriptome profiles were  
172 grouped into species-tissue clusters (Figure 3A). These dominant species-level distinctions in  
173 transcript profiles were further illustrated by pairwise correlations of entire transcriptome  
174 profiles (Figure S3). Unlike metabolite profiles (Figures 2A), none of the transcriptome

175 comparisons showed strong correlations between species in any pairwise comparison (Figure  
176 S3).

177         Among differentially expressed genes (DEGs) in the roots of all three species, we  
178 observed more transcripts induced by salt treatments than suppressed (Figure 3B, left panels).  
179 The majority of these DEGs were identified in ortholog groups (OGs) (see Methods) (Figure 3B,  
180 right panels, and Table S4). *Arabidopsis thaliana* showed the largest number of DEGs in  
181 response to salt stress in both roots and shoots. Interestingly, the *A. thaliana* shoot  
182 transcriptome had more than twice the number of DEGs observed in the root transcriptome in  
183 response to salt stress (Figure 3B), although the nutrient profiles under salt stress in shoots  
184 showed minimal changes compared to roots (Figure 1C). *Arabidopsis thaliana* also had  
185 thousands of salt-responsive DEGs compared to remarkably fewer DEGs in the extremophytes  
186 especially in shoots (Figure 3B).

187         We next examined if transcriptomic changes associated with cellular homeostasis in *A.*  
188 *thaliana* entailed processes already maintained or induced in the extremophytes during salt  
189 treatments. This search was done at two levels. First, we clustered all 1-to-1 orthologs based on  
190 their basal expression levels (from control samples); filtered the clusters to show expression  
191 patterns that differed at least in one species compared to the other two; and identified  
192 enriched functional processes in each cluster (Table 1). Responses associated with abiotic stress  
193 were among the most highly representative processes in each of these clusters. Second, we  
194 investigated the changes in transcriptomic profiles during salt treatments by identifying  
195 functional clusters enriched among all ortholog groups (OGs) that included at least one DEG in a  
196 species, considering roots and shoots separately (Figure 3C and Table S5 and S6). Response to  
197 stress formed the largest functional cluster including the highest number of OGs in both roots  
198 and shoots (RC1 and SC1 in Figure 3C), which were further sub-clustered to highlight various  
199 salt responsive pathways mediated by auxin and ABA regulation and oxidative stress responses  
200 (Figure S4). Amino acid metabolism (RC2) and sugar metabolism (RC3) formed the next two  
201 largest root clusters followed by transmembrane transport (RC4) and ion transport (RC5)  
202 (Figure 3C). In shoots, the second and third largest functional clusters (SC2 and SC3 in Figure 3C)  
203 suggested cellular processes involved in plant development and growth/cell cycle, in which the

204 majority of the *A. thaliana* orthologs were salt-repressed. The extremophytes showed  
205 enrichment of similar functional processes associated with abiotic stresses when treated with  
206 the 250 mM NaCl concentration (Figure S5).

207 We have identified ortholog clusters showing salt-responsive co-expression across time  
208 points within tissues among species. We presented the two most dominant co-expression  
209 clusters in roots and shoots (Figure 3D and Table S7). In roots, the largest co-expression cluster  
210 showed that *A. thaliana* orthologs were substantially salt-induced, compared to a much smaller  
211 magnitude of induction seen in the extremophyte orthologs (Figure 3D, left panel). In shoots,  
212 the largest co-expression cluster included *A. thaliana* orthologs suppressed in response to salt,  
213 while expression of the extremophyte orthologs was stable (Figure 3D, right panel).

214

### 215 **The predominant transcriptomic signature in roots supports divergent auxin-dependent root** 216 **growth during salt stress**

217 In all three species, response to stress was the most significantly enriched function in  
218 roots among ortholog sets showing either different basal-level expression (Table 1) or salt-  
219 responses (Figure 3C) among species. The largest representative function among all subclusters  
220 were response to hormones in all ortholog sets, especially in roots (Table 1, Figures S4A, S5A,  
221 and S5C). Hormonal regulation plays an important role in salt stress responses<sup>27</sup>. Furthermore,  
222 our comparative ortholog expression profiling suggested that regulation of hormone signal  
223 transduction differed among the target species (Figures 4A, S6, and Table S8). Genes mediating  
224 auxin response via auxin/indole acetic acid (Aux/IAA) repressors<sup>28</sup> and the type 2C protein  
225 phosphatases (PP2Cs) that negatively regulate abscisic acid (ABA) signaling<sup>29</sup> showed  
226 contrasting salt-responsive expression among the three species. Specifically, in response to salt,  
227 15 out of 24 *AUX/IAAs* and *PP2Cs* orthologs in *A. thaliana* and *E. salsugineum* were significantly  
228 induced whereas none of those orthologs in *S. parvula* showed any change (Figures 4A, S6, and  
229 Table S8). When the basal expression of these orthologs were examined, 11 out of 17 *E.*  
230 *salsugineum* *AUX/IAA* orthologs and 5 out of 7 *S. parvula* *PP2C* orthologs showed higher basal  
231 expression compared to their respective orthologs in the other species (Figure 4A bottom  
232 panel, and Table S8). In contrast, expression patterns of orthologs encoding regulators of other



233 steps in the auxin and ABA signaling pathway as well as other hormone signaling pathways  
234 showed much fewer or no differences among the three species (Figures S6, and Table S8).

235 Auxin and ABA suppress root elongation and lateral root initiation during salt stress in *A.*  
236 *thaliana*<sup>30,31</sup>. Therefore, we wanted to investigate if auxin and ABA signaling pathways that  
237 showed significant alterations in their expression profiles in the target species could lead to  
238 distinct root phenotypes indicated by genetic studies in *A. thaliana*. We first selected all known  
239 genes involved in primary root development (GO:0080022) and lateral root development  
240 (GO:0048527) and checked for functionally verified phenotypes associated with those genes  
241 that describe root growth in *A. thaliana*. We curated a list of orthologs that directly led to root  
242 growth promotion or suppression if they are highly expressed or suppressed (see full list of  
243 references used for the selected genotype-phenotype associations in Table S9). Next, we  
244 assigned a binary category of promotion or suppression of root growth to each ortholog based  
245 on their high or low basal expression levels in one species compared to the other two. The final  
246 set of 35 single copy orthologs were assigned to a root growth map (Figure 4B) and a gene  
247 network for lateral root development (Figure S7, modified from De Rybel et al., 2010<sup>32</sup>; Banda  
248 et al., 2019<sup>33</sup>). We found 27 orthologs in *S. parvula* that suggested increased primary root  
249 elongation or suppressed lateral root initiation, while 23 orthologs in *E. salsugineum* suggested  
250 slower primary and lateral root growth when compared to the remaining two species (Figures  
251 4B and S7). Contrastingly, *A. thaliana* showed 25 orthologs that supported its fast primary root  
252 growth and increased lateral root number. Notably, the majority (71%) of these 35 orthologs  
253 were annotated as auxin-responsive genes (Figure 4B).

254 In line with the observed differences in expression of orthologs associated with root  
255 development (Figure 4B and S7), *S. parvula* and *A. thaliana* seedlings indeed have comparable  
256 primary root lengths at control conditions, longer than primary roots in *E. salsugineum* (Figures  
257 4C and D). Moreover, *S. parvula* showed uncompromised primary root growth compared to *E.*  
258 *salsugineum* and *A. thaliana* when treated with salt for an extended time (Figures 4C, D, and  
259 S8). *Schrenkiella parvula* and *Eutrema salsugineum* seedlings also had fewer lateral roots  
260 compared to *A. thaliana* at control conditions (Figure 4E). However, lateral root growth,  
261 assessed using total lateral root number and density during a week-long salt treatment,

262 indicated that *S. parvula* not only sustained uninterrupted root growth but also induced lateral  
263 root initiation albeit lower initial numbers during salt treatments, in contrast to the responses  
264 observed for *A. thaliana* and *E. salsugineum* (Figures 4E, F, and S8).

265 To further identify orthologs in *S. parvula* that support its unique pattern of  
266 uninterrupted primary root growth and lateral root initiation during salt stress, we checked co-  
267 expression clusters that included differentially expressed ortholog groups (DEOGs) in roots. We  
268 found two clusters where *S. parvula* showed a distinct expression pattern compared to the  
269 other two species (Figure 4G). The first cluster showed salt-induced expression unique to *S.*  
270 *parvula*. This accounted for 11% (294 ortholog groups) of all DEOGs in roots (Table S10). The  
271 second cluster with 113 OGs (5% of all root DEOGs) showed induction of genes in response to  
272 salt stress in *A. thaliana* and *E. salsugineum* while the orthologs in *S. parvula* did not alter their  
273 expression (Figure 4G). Interestingly, within these two clusters, nearly 50% of orthologs did not  
274 have a GO annotation describing a specific pathway or molecular function implying the  
275 substantial unexplored functional gene space of these orthologs (Table S10).

276

## 277 **Transcriptome-metabolome coordination in extremophytes provides protection from salt** 278 **stress**

279 There were 7,852 differentially expressed ortholog groups (DEOGs) and 634  
280 differentially abundant metabolites (DAMs) collectively in the three species in response to all  
281 salt treatments (Figures 2 and 3, Table S2 and 4). The difference in % change in response to salt  
282 between DAMs and DEGs was the lowest in *A. thaliana*, while in extremophytes metabolic  
283 responses were relatively larger compared to the overall transcriptomic response during salt  
284 treatments (Figures 5A and S9A). This indicates that there is more preparedness at the  
285 transcriptome level to respond to salt along with a dynamically responsive metabolome in the  
286 extremophytes than in *A. thaliana*.

287 The second and third largest functional clusters over-represented among differentially  
288 expressed ortholog groups (DEOGs) in roots were amino acid and sugar metabolism (550  
289 DEOGs) (Figure 3C, RC2 and RC3). Additionally, the overall metabolite response indicated a high  
290 correlation of the metabolomes between the two extremophytes *S. parvula* and *E. salsugineum*

291 during salt treatments, and the DAMs shared between the extremophytes were enriched in  
292 amino acids and sugars (Figure 2). Collectively, these findings led us to examine whether a  
293 coordinated transcriptomic response (i.e. DEGs associated with amino acid and sugar  
294 metabolism) support a salt-induced metabolic response (i.e. DAMs that are amino acids and  
295 sugars) in the extremophytes. In line with the global trend (Figure 5A), we observed fewer DEGs  
296 associated with amino acid and sugar metabolism in both extremophyte roots than in *A.*  
297 *thaliana* roots, but more amino acid and sugar metabolites were found as DAMs in  
298 extremophytes in roots (Figure 5B).

299         Given the established role of amino acids and sugars as organic osmoprotectants during  
300 salt stress <sup>26</sup>, we focused on highly responsive DAMs that are also osmoprotectants and the key  
301 genes that encode proteins involved in the synthesis of those metabolites (Figures 5C and D,  
302 and S9A). Proline was one of the most significant DAMs found in the roots of both  
303 extremophytes. It was not only found at a higher basal level in the extremophytes than in *A.*  
304 *thaliana*, but also its abundance further increased with salt treatments specifically in the  
305 extremophytes (Figure 5C). Concordant with this increase in proline abundance, both  
306 extremophytes increased their transcript levels for *pyrroline-5-carboxylate synthetase (P5CS1)*,  
307 which encodes the primary proline biosynthesis enzyme, and decreased expression for *Pro-*  
308 *dehydrogenase (ProDH1)*, which encodes an enzyme involved in proline catabolism (Figures 5C  
309 and S9B). Additionally, shikimic acid-derived amino acids, tyrosine, and phenylalanine  
310 (precursors of phenylpropanoids) showed higher basal level abundances or significant  
311 inductions in roots of both extremophytes compared to *A. thaliana* (Figure 5C). Interestingly,  
312 genes coding for the enzymes directly involved in the conversion of phosphoenolpyruvate to  
313 shikimic acid such as *DAHPS1*, *DAHPS2*, *DHQS*, *DHQ*, *SK1*, *ESPS*, and *CS* were not detected as  
314 DEGs in any of the three species (Figure S9C). However, *MYB15*, a master regulator of shikimic  
315 acid biosynthesis pathway (Chen et al., 2006), was highly induced in all three species (Figure  
316 5C). *Chorismate mutases 1 (CM1)*, coding for the enzyme involved in the first committed step of  
317 tyrosine and phenylalanine biosynthesis was further induced in *E. salsugineum*, while it was  
318 constitutively expressed at a high level in *S. parvula* (Figure 5C).

319 *Eutrema salsugineum* maintained a higher basal abundance than the other two species  
320 for multiple sugars in roots that are commonly used as organic osmolytes in plants, while these  
321 metabolites increased their abundances in response to salt in *S. parvula* (Figure 5D). The genes  
322 encoding enzymes involved in the biosynthesis of these metabolites such as *sucrose synthase 1*  
323 (*SUS1*), *cell wall invertase 1 (cwIN1)*, *galactinol synthase 2 (Gols2)*, and *raffinose synthase* were  
324 mostly induced under salt or constitutively highly expressed in the extremophytes (Figure 5D).  
325 A similar concordant alignment of DAMs to DEGs, or maintenance of high constitutive  
326 abundance of metabolites with high basal expression of genes were also found for metabolites  
327 and their associated genes in the extremophytes, known for their functions as antioxidants (for  
328 example, dehydroascorbic acid pathway highlighted in Figure S9D).

329

### 330 **Coordination between nutrient balance and gene expression associated with ion transport**

331 Ion and membrane transport represented the two remaining major functionally  
332 enriched clusters in roots that included 156 DEOGs (Figure 3C, RC4 and RC5). As noted earlier,  
333 nutrient balance in the extremophytes was maintained during salt treatments, unlike that in *A.*  
334 *thaliana* (Figure 1C). To examine how the transcriptomic response specifically supported better  
335 nutrient balance in the extremophytes compared to *A. thaliana* (Figure 1), we first investigated  
336 all 148 transporter genes associated with Na/K transport (based on Araport11 (Cheng et al.,  
337 2017)) in the following four categories: (1) aquaporins (*PIPs*, *NIPs*, *TIPs*, and *SIPs*), (2) cation  
338 transporters (*CAXs*, *NHXs*, *KEAs*, *CHXs*, *KUPs*, *HKT1*, and *TRH1*), (3) non-selective cation channels  
339 (*CNGCs* and *GLRs*), and (4) K channels (*SKOR*, *GORK*, *AKTs* and *KCOs*). We found 109  
340 corresponding one-to-one ortholog groups (OGs), among which 64 OGs were differentially  
341 expressed at basal expression among the three species (Table S11). We focused on the OGs  
342 encoding transporters and channels that were differentially expressed at basal levels in both  
343 extremophytes compared to *A. thaliana* (Figure 6A). Genes encoding transporters known to  
344 exclude Na from the cell (*SOS1*), transporters involved in Ca uptake and transport (*CNGC1*,  
345 *CNGC12*, *CAX1*, and *CAX5*), K channel (*KAT1*), and endosomal K transporter (*KEA5*) that aid in  
346 pH and ion homeostasis<sup>34,35</sup> showed higher basal expression in the two extremophytes than in  
347 *A. thaliana*, while genes involved in K efflux/Na influx to the cell or water transport such as

348 *TIP1;1*, *PIP2;2*, *SIP1;2*, *SIP2;1*, *KUP5/6/10/11*, and *NHX3* were lower expressed in the  
349 extremophytes (Figure 6A, Table S11). *NHX1/2*, the main transporters involved in Na  
350 sequestration into the vacuole <sup>36</sup>, showed higher basal level expression in *E. salsugineum*  
351 compared to the other two species (Table S11). This observation aligns with *E. salsugineum*  
352 showing a higher Na sequestration (also higher tissue tolerance) than *S. parvula* and *A. thaliana*  
353 (Figure 1A).

354 We then examined how these genes in different transporter classes changed in  
355 expression in the three species when treated with salt (Figure 6B and Table S12). Interestingly,  
356 the majority of the genes across the four categories were either significantly induced or  
357 constant in expression during salt treatments in *S. parvula*, whereas *A. thaliana* and *E.*  
358 *salsugineum* had a mixed response (Figure 6B). *Eutrema salsugineum* mostly repressed the  
359 expression of genes encoding non-selective cation channels (e.g. *GLRs*) in response to all salt  
360 treatments (Figure 6B and Table S12). Other observable trends included the induction of *CHX17*  
361 (functions in K uptake) identified as the only induced transporter in all three species in our  
362 selected set; a 50-fold induction of *CHX2* (involved in Na transport to vacuole) in *A. thaliana*  
363 (Table S12); and *GORK* as the only K channel up-regulated in *E. salsugineum* under salt  
364 treatment while maintaining high basal level expression in *S. parvula*.

365 We next expanded the focus on the transporter genes to include copy number variation  
366 among species and expression partitioned to paralogs present in each species (Figure 6C). We  
367 searched for transporter gene orthologs with increased copy numbers in the extremophytes  
368 and found, *SpNIP6;1/2* in *S. parvula*, *EsCNGC4;1/2* in *E. salsugineum*, *SpKUP9;1/2* and  
369 *EsKUP9;1/2* in both extremophytes (Figure 6C, top panels, and Table S13). All extremophyte  
370 paralogs either showed differential expression in response to salt or high constitutive  
371 expression compared to *A. thaliana* (Figure 6C, bottom panels).

372 Finally, we examined the expression profiles of all non-Na/K transporters involved in  
373 nutrient uptake that were included in DEOGs in Figure 3C functional clusters RC4 and RC5  
374 (Figure 6D and Table S13). Notably, *S. parvula* induced orthologs encoding a large and diverse  
375 set of transporters involved in nutrient uptake upon salt treatments, while *A. thaliana* and *E.*

376 *salsugineum* showed salt-induction of a limited group of genes associated with Fe, Zn, and Cu  
377 uptake (e.g. *FER1/2/3*, *MTPB1*, *ZF14*, *ZIP2/11*) (Figure 6D).

378

## 379 **Discussion**

380 While the direct flow of Na ions into plant tissue is unavoidable in saline soils, plants  
381 show adaptations at varying degrees to limit accumulation of Na or mitigate cellular toxicity  
382 caused by Na in tissues<sup>2,3,7</sup>. Figure 7 summarizes the most notable ionomic, metabolomic,  
383 transcriptomic, and phenotypic adjustments that distinguish the three model plants used in this  
384 study when responding to salt treatments. Overall, *S. parvula* and *E. salsugineum* show similar  
385 levels of salt tolerance, but they achieve this tolerance by different means. *Schrenkiella parvula*  
386 exhibits uncompromised primary root growth and nutrient uptake while limiting Na uptake.  
387 This coincides with an increase in amino acids and sugars that can serve as nitrogen-carbon  
388 sources, organic osmolytes, and antioxidants beneficial during salt stress. In contrast, *E.*  
389 *salsugineum* does not restrict Na accumulation in roots, and grows much more slowly under  
390 salt stress. It accumulates sugars and amino acids at remarkably high levels compared to the  
391 other two species. We find that the two extremophytes regulate different ortholog groups in  
392 the same pathways in response to salt stress in multiple comparisons. The divergent responses  
393 observed across multiple –omics data lead to a convergently salt tolerant phenotype in the  
394 extremophytes (Figure 7).

395

## 396 **Divergent response to Na accumulation and convergent outcome in maintaining nutrient** 397 **balance during salt stress in extremophytes**

398 Unlike *A. thaliana*, which fails to maintain its nutrient balance under salt stress as the Na  
399 content within tissues increases (Figure 1A-C), the two extremophytes present two distinct  
400 paths for regulating Na levels in roots. *Schrenkiella parvula* regulates Na accumulation to  
401 maintain it at levels observed for control conditions, while preventing the loss or maintaining  
402 the uptake of K and Ca. In contrast, *E. salsugineum* does not show such a restriction to Na  
403 accumulation in roots but reaches the same outcome as *S. parvula*, such that a significant loss  
404 of K and Ca is prevented.

405 Regulation of Ca and K is a critical requirement for ion homeostasis and response to  
406 excess Na<sup>3,7</sup>. Ca activates Na efflux via the SOS2-SOS3 signaling pathway, which in turn  
407 activates the plasma membrane localized Na-exporter, *SOS1*<sup>37</sup>. Additionally, Ca regulates the  
408 plasma membrane localized non-selective cation channels (NSCCs), which are reportedly a main  
409 entry point of Na into roots<sup>38,39</sup>. Genes encoding NSCCs were highly suppressed in *E.*  
410 *salsugineum* during salt stress, consistent with previous findings<sup>40</sup> (Figure 6B and 7). However,  
411 counterintuitively, these NSCCs were induced or unaltered in *S. parvula* during salt treatments  
412 (Figure 6B), despite it having a relatively smaller Na content than salt-treated *E. salsugineum*  
413 (Figure 1A). The high basal level of Ca in *S. parvula* roots may alleviate Na-induced cellular  
414 toxicity by increasing the selectivity of NSCCs to limit Na entry<sup>39</sup> (Figure 1D).

415 Halophytes are known for their ability to maintain high K/Na ratios when exposed to  
416 salt, although the species-dependent ratios may vary among halophytes<sup>3,41,42</sup>. Under salt  
417 stress, Na-induced membrane depolarization at the root epidermis could be reversed by the  
418 activation of the K outward rectifying channel, *GORK*, by releasing cytosolic K as seen in *A.*  
419 *thaliana* root hairs<sup>43,44</sup>. *GORK* expression in roots was induced in *E. salsugineum* when exposed  
420 to 250 mM NaCl and maintained at a high basal level in *S. parvula*, compared to *A. thaliana*  
421 (Tables S4 and 12). Therefore, *GORK* channels may help to prevent the membrane from further  
422 depolarization in extremophytes at high salinities. It is unclear how the extremophytes regulate  
423 their K transporters to allow K uptake and simultaneously prevent excessive leakage of K during  
424 salt stress. The extremophytes seems to have an alternative co-regulation of Na and K  
425 transporters different from *A. thaliana*. One such modified pathway in the extremophytes  
426 points to a possible synergistic activity between *GORK* and *KAT1* (K channels) synchronized with  
427 Na exclusion mediated by *SOS1* to regulate cytosolic K levels, pH, and ion homeostasis when  
428 exposed to salt. Coordinated expression of *GORK* and *KAT1* has been reported for guard cells in  
429 *A. thaliana*<sup>45,46</sup>. Compared to *A. thaliana*, *KAT1* is highly expressed at basal expression in the  
430 roots of both extremophytes (Figure 6A). Notably, the expression of these K channels is  
431 regulated by ABA and auxin signaling pathways, which are modified in both extremophytes  
432 compared to *A. thaliana* in conjunction with root growth modulation in response to salt  
433 (Figures 4, S7, and 7)<sup>47</sup>. Intracellular K transport, as seen with *KEA5* (a K transporter in the

434 trans-Golgi network) and *KUP9* (mediates K and auxin transport from the endoplasmic  
435 reticulum) <sup>34,48</sup> appear to be differently regulated between the extremophytes and *A. thaliana*  
436 (Figures 6A and 7). It would be interesting to investigate whether the *KUP9* duplication in the  
437 extremophytes has led to divergent salt-responsive regulation in auxin homeostasis, and  
438 consequently lead to resilient root growth.

439

#### 440 **Metabolic preadaptation or a dynamic response to achieve salt-adaptation in extremophytes**

441 Sugars, amino acids, or their derivatives are used in all plants for osmoregulation during  
442 salt stress <sup>26</sup>. The most striking metabolic feature among the three species in our study is the  
443 extraordinarily high levels of sugars and amino acids in *E. salsugineum* even in control  
444 conditions compared to the other two species (Figures 2C and 7). The *E. salsugineum*  
445 metabolite profiles we observed are consistent with earlier studies that examined selected  
446 metabolites in *E. salsugineum* <sup>49–51</sup>. *Eutrema salsugineum* leaves and seedlings are metabolically  
447 preadapted to salt stress <sup>20–22</sup>. Our results reinforce this view and extend these observations to  
448 roots (Figures 2C and 7). In contrast, *S. parvula* maintains much lower levels of sugars and  
449 amino acids comparable to levels seen in *A. thaliana* in control conditions and increases their  
450 levels in response to salt to the high basal level present in *E. salsugineum* (Figures 2 and 7).  
451 Complementary to this dynamic metabolic response, *S. parvula* exhibits a higher degree of  
452 transcriptome preadaptation to salt stress, having fewer DEGs in both roots and shoots in  
453 comparison to the other two species (Figures 3B and 5A).

454 Proline is among the most studied osmoprotectants and antioxidants in plants <sup>3,52</sup>.  
455 While the key proline biosynthesis gene, *P5CS1*, was induced by salt in all three species,  
456 *ProDH1*, encoding an enzyme that degrades proline, was suppressed only in the extremophytes,  
457 coincident to significant proline accumulation during salt stress (Figure 5C). *ProDH1* is  
458 suppressed by sucrose in *A. thaliana* <sup>53</sup>. Our results suggest a novel regulatory mode for proline  
459 accumulation via high sucrose levels (facilitated by induced *SUS1* which is regulated by osmotic  
460 stress independent of ABA <sup>54</sup> that may lead to the suppression of *ProDH1*, and thereby allowing  
461 proline accumulation in the extremophytes (Figure 5D).



462 High levels of sugars and amino acids may serve as a carbon or nitrogen source to  
463 maintain growth when photosynthesis and nitrogen acquisition decrease with abiotic stress  
464 <sup>27,51,55</sup>. *Eutrema salsugineum* roots grow much slower than *A. thaliana* and *S. parvula* primary  
465 roots under control conditions (Figure S8). A high proportional allocation of sugars such as  
466 sucrose and raffinose together with amino acids known for nitrogen storage, especially proline,  
467 is a common trait associated with slow-growing plants <sup>56,57</sup>. Some of these metabolites that are  
468 high at basal levels may have added benefits for serving as osmoprotectants or antioxidants  
469 when a slow-growing annual such as *E. salsugineum* experiences high salinity levels.  
470 *Schrenkiella parvula* dynamically accumulates these metabolites during salt treatments,  
471 without an indication of compromised growth, to match the levels maintained in *E.*  
472 *salsugineum* (Figures 4 and 5) <sup>58</sup>.

473

#### 474 **Divergent root transcriptional networks with convergent stress-resilient growth in** 475 **extremophytes**

476 *Schrenkiella parvula* and *Eutrema salsugineum* have lower lateral root densities  
477 compared to *A. thaliana* (Figure 4F). Auxin is a major hormone that regulates root architecture  
478 including lateral root development <sup>59</sup>. Lateral roots are initiated by binding of auxin to its  
479 receptor TIR1, resulting in degradation of the auxin signaling repressors, Aux/IAAs <sup>60</sup>. In both  
480 extremophyte, the *TIR1* orthologs are suppressed in control conditions coincident to  
481 suppression of multiple *Aux/IAAs* and other downstream transcription factors in control or salt-  
482 treated conditions, a pattern collectively supporting the observed limited lateral root initiation  
483 <sup>33</sup> (Figures 4B and S7). The two extremophytes either show a slower root growth rate (in *E.*  
484 *salsugineum*) or higher primary root growth rate (in *S. parvula*) coupled with lower lateral root  
485 density, which may reduce the total contact area with salt. Interestingly, the transcriptional  
486 network mediated by auxin and other hormones in the extremophytes indicates multiple  
487 regulatory points for root growth modulation leading to different root architectures (Figure S7).

488 Molecular phenotypes suggesting transcriptional preadaptation to multiple abiotic  
489 stresses have been reported for *S. parvula* and *E. salsugineum* separately <sup>20,21,23,61–63</sup>. Our work  
490 indicates that orthologs of stress-associated functional gene clusters that exhibit

491 transcriptional preadaptation in one extremophyte are in many instances dynamically induced  
492 by salt in the other extremophyte and ultimately match the expression level found in the  
493 preadapted species (e.g. Figure 4G). This highlights independent and divergent regulation of  
494 orthologs even between closely related extremophytes in response to the same salt  
495 treatments, demonstrating different adaptive strategies.

496 Our study highlights different combinatorial expression modules for stress-optimized  
497 growth used by these two extremophytes to adapt to high salinities. For example, the selective  
498 release of repression in auxin and ABA signaling pathways likely leads to different *S. parvula*  
499 and *E. salsugineum* root growth strategies absent in *A. thaliana* and needs further investigation  
500 to identify additional regulatory dependencies using targeted studies in the extremophyte  
501 models. Similarly, comparisons from multiple extremophytes can serve as training data to  
502 identify compatible regulatory pathways that can coexist but are currently absent in crops. Such  
503 pathways need to be evaluated for their functionality to metabolic cost to decide whether  
504 constitutive expression (as pre-adaptive traits) or induced expression (as dynamic responses)  
505 offer an optimum strategy depending on the stress being constant or intermittent in certain  
506 environments. The scarcity of halophytes implies a high metabolic cost and complex regulation  
507 required for salt adaptation enabling coordinated growth from cellular to whole plant level<sup>64</sup>.  
508 Extremophytes provide a direct resource when modeling stress resilient growth using core  
509 pathways critical to deliver growth and survival during environmental stress<sup>65</sup>. For sustainable  
510 global food security, our crops need to be diversified; less dependent on fresh water and high  
511 nutrient soils; while being adapted to varying levels of marginal soils with different salinities  
512<sup>66,67</sup>. Therefore, basic research examining genetic regulation underlying stress-optimized growth  
513 will be a prerequisite when selecting new crops in light of a climate crisis.

514

## 515 **Materials and methods**

### 516 **Plant growth and treatments**

517 *Schrenkiella parvula* (ecotype Lake Tuz, Turkey; Arabidopsis Biological Resource  
518 Center/ABRC germplasm CS22663), *Eutrema salsugineum* (ecotype Shandong, China; ABRC  
519 germplasm CS22504), and *Arabidopsis thaliana* (ecotype Col-0) seeds were surface-sterilized

520 and stratified at 4 °C for 7 days (for *A. thaliana* and *S. parvula*) or 14 days (for *E. salsugineum*).  
521 Stratified seeds were germinated and grown in a hydroponic system as described by Conn et al.,  
522 (2013)<sup>68</sup> for transcriptomic, ionic, and metabolomic experiments (Figure S1B). The plants  
523 were grown in aerated 1/5x Hoagland's solution in a growth cabinet set to 22-23 °C,  
524 photosynthetic photon flux density at 80-120  $\mu\text{mol m}^{-2}\text{s}^{-1}$ , and a 12 hr light / 12 hr dark cycle.  
525 Fresh Hoagland's solution was replaced every two weeks. Four-week-old plants were randomly  
526 placed in 1/5x Hoagland's solution with and without NaCl for indicated duration in each  
527 experiment.

528

### 529 **Root growth analysis**

530 Stratified seeds were germinated on 1/4x MS medium. Five-day old seedlings were  
531 transferred to 1/4x MS plates supplied with 150 mM NaCl. Root growth was recorded every two  
532 days for one week. Control and treated seedlings were scanned and analyzed using ImageJ<sup>69</sup> to  
533 quantify primary root length and number of lateral roots. Three biological replicates were used  
534 with 7 seedlings per replicate from each species.

535

### 536 **Elemental analysis**

537 Elemental quantification was conducted for Na, K, Ca, P, S, Mg, Fe, B, Zn, Mn, Mo, Cu,  
538 Ni, and Co using Inductively Coupled Plasma - Mass Spectrometry (ICP-MS, Elan 6000 DRC-  
539 PerkinElmer SCIEX) at the US Department of Agricultural Research Service at Donald Danforth  
540 Plant Science Center. We used dried root and shoot samples from 3-4 biological replicates from  
541 each condition harvested at 3 and 24 hr (Figure S1) processed as described in Baxter et al.,  
542 (2014)<sup>70</sup>. Changes in element contents were calculated as the  $\log_2$  fold change of the element  
543 level in treated samples over that in control samples and visualized with the heatmap in R.  
544 Significant differences between treatments within species were determined by one-way  
545 ANOVA followed by Tukey post-hoc test using agricolae in R with an adjusted  $p$ -value cutoff of  
546 0.05. Basal level of each element per species was calculated as a % contribution from each  
547 species that added to 100% for each element, using the following formula:  $X_i / (A_i + S_i + E_i) * 100$   
548 where  $X_i$  represents the abundance of element  $i$  in *A. thaliana*, *S. parvula* and *E. salsugineum*,

549 respectively. Only elements that showed significant differences in abundance among the three  
550 species were visualized on ternary diagrams using ggtern in R.

551

## 552 **Metabolite analysis**

553 Untargeted high throughput metabolite profiling was conducted using gas  
554 chromatography-mass spectrometry (GC-MS) service at the West Coast Metabolomics Center,  
555 University of California Davis. Root and shoot samples in 4 biological replicates were harvested  
556 at 24 and 72 hr (Figure S1B), flash frozen in liquid N<sub>2</sub>, and processed as described in Fiehn,  
557 (2016)<sup>71</sup> and quantified as described in Pantha et al., (2021)<sup>63</sup>.

558 Pearson correlation coefficients for each test condition were calculated between species  
559 using Log<sub>2</sub> median-normalized relative metabolite abundances. Significant differences in  
560 metabolite abundances across treatments within species (differently abundant metabolites,  
561 DAMs) was determined by one-way ANOVA followed by Tukey post-hoc test using agricolae in R  
562 with an adjusted *p*-value cutoff of 0.05. Structurally annotated (known) metabolites were  
563 further categorized into functional groups according to the refmet database  
564 (<https://www.metabolomicsworkbench.org/databases/refmet/index.php>) and Kyoto  
565 Encyclopedia of Genes and Genomes (KEGG). Metabolites were clustered into amino acids,  
566 sugars, nucleic acids, and other organic acids. Derivatives or precursors of those were included  
567 in the same metabolite category if those metabolites were found to be within three steps of the  
568 main metabolite category identified in a KEGG pathway (Table S2). Basal level of each  
569 metabolite per species was calculated as a % contribution from each species that added to  
570 100% for each metabolite as described for the elemental basal level calculation. Metabolites  
571 that showed significant differences in abundance at basal level or under salt treatments in at  
572 least one species were used for K-mean clustering (k= 9)<sup>72</sup>. The metabolite profiles across  
573 samples were done using pheatmap in R.

574

## 575 **Orthologous group identification**

576 Ortholog groups were identified using *S. parvula* gene models version 2.2 from  
577 Phytozome (<https://phytozome-next.igi.doe.gov/>); *A. thaliana* gene models version 10 (TAIR10)

578 from TAIR (<https://www.arabidopsis.org/download/>), and *E. salsugineum* gene models version  
579 210.3 from CoGe (<https://genomevolution.org/coge/>). Reciprocal gene pairs between species  
580 were identified using blastp with default parameters and an e-value cutoff of 1E-5. These pairs  
581 were filtered using a custom python script to convert a blast tabular output into a table of one  
582 query-subject pair per line by consolidating High-scoring Segment Pairs (HSPs); and based on  
583 calculated proportion of query and subject covered by HSPs (coverage) and approximate  
584 proportion of identical sequences within HSPs (identity). Pairs with an alignment coverage  
585 smaller than 50% of the query or the subject were removed. This ortholog-pair list included  
586 pairs with the highest bit score optimized for highest % coverage, and % identity. Ortholog pairs  
587 were additionally filtered to exclude any orthologs that had a more than  $\pm 30\%$  length  
588 difference in the coding sequence between the two sequences. A total of 16,591 one-to-one  
589 ortholog groups were identified among the three species and used for all downstream analyses  
590 (Table S3).

591

## 592 **Gene expression profiling and analysis**

593 Total RNA was extracted from control and treated samples at 3 and 24 hr with three  
594 biological replicates (Figure S1) using Qiagen RNeasy Plant Mini kit (Qiagen, Hilden, Germany),  
595 with an on-column DNase treatment. mRNA enriched samples were converted to libraries using  
596 True-Seq stranded RNAseq Sample Prep kit (Illumina, San Diego, CA, USA), multiplexed, and  
597 sequenced on a HiSeq4000 (Illumina) platform at the Roy K. Carver Biotechnology Center,  
598 University of Illinois at Urbana-Champaign. A minimum of >15 million 50-nucleotide single-end  
599 reads per sample were generated for a total of 78 RNAseq samples.

600 After quality checks, the reads were mapped to reference transcript model sequences of  
601 gene models in each species (described earlier) using Bowtie<sup>73</sup> with -m 1 --best -n 1 -l 50. A  
602 custom python script was used to count uniquely mapped reads for each gene model.  
603 Differentially expressed genes (DEGs) across treatments within each species were identified  
604 using DESeq2<sup>74</sup> with an adjusted  $p$ -value  $\leq 0.01$ . Genes were further filtered using the following  
605 criteria: 1)  $|\log_2 \text{fold change}| \geq 1$  or 2)  $|\log_2 \text{fold change}| \geq 0.5$  if normalized mean expression  
606 across samples  $\geq 100$ . Reads per kilobase per million reads (RPKM) were calculated for each

607 gene from the raw read counts for all samples. These RPKM values were  $\log_2$ -transformed and  
608 median-normalized when used in PCA-UMAP<sup>75</sup> and for co-expression cluster determinations.  
609 Co-expression clusters were identified using fuzzy K-mean clustering with a membership cutoff  
610  $\geq 0.4$  or binary clustering based on  $\log_2$  fold change.  $\log_2$  fold changes were computed for all  
611 ortholog groups (OGs) from three species, subsequently used to calculate Pearson correlation  
612 coefficients when comparing transcriptome profiles between species/samples. Ortholog groups  
613 where at least one of the genes in the group was identified as a DEG in any species under any  
614 stress condition was considered to be a differentially expressed ortholog group (DEOG).

615 To compare the basal expression levels of orthologs among species, we generated a raw  
616 count matrix based on reads uniquely mapped to coding sequences (CDS) for the 16,591  
617 orthologs from control samples. Orthologs that are differently expressed between any two of  
618 the three species were identified using DESeq2 at an adjusted  $p$ -value  $\leq 0.001$  in a pairwise  
619 manner. We next assigned the expression of each gene within any given OG as High (H),  
620 Medium (M), and Low (L) based on their relative expression level, which resulted in 12 clusters.  
621 The six largest clusters in both roots and shoots highlighted the expression difference in one  
622 species compared to the other two species. OGs assigned to these clusters were represented by  
623 HLH, LHL, HHL, LLH, LHH, and HLL (expression profiles). Each expression profile was then  
624 subjected to functional gene enrichment analysis.

625 BiNGO<sup>76</sup> was used to identify Gene Ontology (GO) terms enriched in selected DEGs and  
626 DEOGs. To reduce the redundancy between enriched GO terms, we further grouped them into  
627 GO clusters using GOMCL<sup>77</sup> with settings for -Ct 0.5 -I 1.5 -Sig 0.05 -hm -nw -hgt -d -gosize 3500  
628 -gotype BP. Sub-clustering of selected clusters was performed using GOMCL-sub with the same  
629 parameters.

630 OrthNets for selected genes were generated using the CLfinder-OrthNet pipeline with  
631 the reciprocal blastp results as input using default OrthNet settings<sup>78</sup>, and visualized in  
632 Cytoscape.

633

634 **Curated gene sets for primary metabolism, hormone signaling, root development, and**  
635 **transporter functions**

636 OGs and DEOGs that showed significant differences at basal level/control condition or  
637 under treatments were mapped to the KEGG pathways associated with primary metabolism,  
638 hormone regulation, or root development. Log<sub>2</sub> fold changes were computed for all selected  
639 OGs and visualized with heatmap in R. Genes involved in root development were identified  
640 from Gene Ontology annotations, GO:0048527 for lateral root development and GO:0080022  
641 for primary root development. Genes coding for transport functions associated with K/Na  
642 transport were mined from Araport 11. To assess the correlation between changes at the  
643 transcriptomic level and the metabolic level, we calculated the percentage of DEGs and  
644 differently abundant metabolites (DAMs) in each species at early (3 hr for transcriptome and 24  
645 hr for metabolome) and late (24 hr for transcriptome and 72 hr for metabolome) response to  
646 salt. Percentage of DEGs was calculated by dividing the number of DEGs by the total number of  
647 expressed genes (RPKM ≥ 1) in each species. Similarly, the percentage of DAMs was calculated  
648 by dividing the number of DAMs by the total number of quantified metabolites within a species.  
649 We extracted DEGs and DAMs related to amino acid and sugar metabolism based on GO  
650 (GO:0006520 for amino acid metabolism and GO:0005975 for carbohydrate metabolism). The  
651 count of DEGs and DAMs were separately normalized to the total number of genes and  
652 metabolites in each of the two categories.

653

#### 654 **Data availability**

655 All Illumina sequence data are deposited at National Center for Biotechnology Information  
656 BioProject PRJNA63667. Mapped RNAseq data can be browsed using genome browsers created  
657 for *Schrenkiella parvula* and *Eutrema salsugineum* at [www.lslugenomics.org](http://www.lslugenomics.org).

658

#### 659 **Acknowledgement**

660 This work was supported by the US National Science Foundation IOS-EDGE  
661 1923589/20196, NSF-MCB-1616827, US Department of Energy BER-DE-SC0020358, Next-  
662 Generation BioGreen21 Program of Republic of Korea (PJ01317301) awards. Graduate students  
663 K.T., G.W. were supported by an Economic Development Assistantship from LSU. We thank the  
664 LSU High Performance Computing facility for providing computational resources;  
665 undergraduate students Jordan Vivien, Christine Tran, Ashley Doan, and Jason Garcia at LSU for

666 assisting with plant growth and phenotyping; Drs. Alvaro Hernandez and John Cheeseman at  
667 University of Illinois for providing assistance with Illumina sequencing.

668

669 **Author contribution:** K.T. prepared plant samples and conducted data analyses; K.T., G.W., D-  
670 H.O., J.L., A.S., and M.D. contributed to data interpretation. K.T. and M.D. wrote the manuscript  
671 with input from all co-authors who revised and approved the final manuscript. M.D.  
672 conceptualized and supervised the overall project.

673

### 674 **Main figure captions and tables**

675 **Figure 1.** Sodium accumulation and its effect on nutrient balance in the extremophytes  
676 compared to *A. thaliana* under salt stress. [A] Na and [B] K content in roots and shoots. Data are  
677 mean  $\pm$  SD ( $n \geq 4$ , at least 4 plants per replicate). Significant differences between treatment  
678 groups were determined by ANOVA with Tukey's test applied to within species comparisons.  
679 Asterisks indicate significant difference ( $p \leq 0.05$ ) between the treated samples and their  
680 respective controls. Open circles indicate biological replicates. [C] Salt stress-induced changes in  
681 macro- and micro-nutrient content. [D] Percent abundance of nutrients that showed significant  
682 differences in abundance at control conditions among the three species. Significant difference  
683 in elemental abundance was determined by one-way ANOVA with post-hoc Tukey's test at  $p \leq$   
684 0.05. The three axes of the ternary plots are marked with *A. thaliana*, *S. parvula*, and *E.*  
685 *salsugineum*. The gridlines in species-designated colors point to % abundance of the element  
686 from the corresponding species over the total abundance of that element from all three  
687 species. Thus, gridlines of each color nearest to each data point lead to the relative %  
688 abundance in each species.

689 **Figure 2.** Overall metabolic preparedness and adjustments in the roots of the extremophytes  
690 compared to *A. thaliana*. [A] Pairwise Pearson correlations of the abundance of 716 quantified  
691 metabolites across all conditions and species. Blue dots indicate 182 metabolites with known  
692 structures, and grey dots represent 534 unknown metabolites. [B] Number of metabolites that  
693 significantly changed in abundance (DAMs) in each species compared to its respective controls.  
694 [C] Basal level percent abundances of sugars, amino acids, and their derivatives in the three



695 species. [D] Hierarchical clustering of known metabolites shown in [B and C]. Blue box highlights  
696 clusters of interest. Columns indicate metabolites and rows indicate samples. Sample names for  
697 treated conditions are given as treatment concentration and duration, separated by a dash.  
698 Treatment concentrations are 150 and 250 mM NaCl; treatment durations are 24 and 72 hr.  
699 Significant differences were determined by one-way ANOVA with post-hoc Tukey's test at  $p \leq$   
700 0.05 ( $n = 4$ , at least 4 plants per replicate).

701 **Figure 3.** Transcriptomic overview of *Schrenkiella parvula*, *Eutrema salsugineum*, and  
702 *Arabidopsis thaliana* in response to salt. [A] Overall clustering of transcriptomes in shoots and  
703 roots from all replicates in all conditions using one-to-one ortholog groups (OGs). [B] Number of  
704 differentially expressed genes (DEGs) in response to salt treatments. DEGs were identified using  
705 DESeq2 at  $p\text{-adj} \leq 0.01$  ( $n = 3$ , at least 4 plants per replicate). [C] Functional clusters enriched  
706 among differentially expressed ortholog groups (DEOGs) that included a DEG from at least one  
707 species in roots (RC, root cluster) and shoots (SC-shoot cluster). Functional annotations were  
708 based on GO annotations assigned to DEOGs. The bar graph assigned to each cluster represents  
709 percent allocation of induced (red) and suppressed (blue) DEGs with the percentage of genes  
710 that did not significantly change in each species given in the white space. [D] Dominant gene  
711 expression clusters of DEOGs across time points and species from roots and shoots that  
712 included an *A. thaliana* ortholog that was either induced or suppressed in response to 150 mM  
713 NaCl treatment. The average gene expression at each condition is indicated by a dot and  
714 connected by a black line for each species. Individual gene expression is indicated by grey lines.

715 **Figure 4.** Root growth responses in line with gene expression associated with auxin and ABA  
716 signaling in *Arabidopsis thaliana*, *Schrenkiella parvula*, and *Eutrema salsugineum* when treated  
717 with salt. [A] Salt-induced changes in expression of auxin/indole acetic acid (Aux/IAA)  
718 repressors and type 2C protein phosphatases (PP2Cs) that regulate auxin and ABA signaling. [B]  
719 Curated genes from lateral root development (GO:0048527) and primary root development  
720 (GO:0080022) used to infer root growth phenotypes based on functional genetic studies in *A.*  
721 *thaliana*. Ortholog expression levels are categorized as high (yellow), low (turquoise), and  
722 indistinguishable (no-color) based on their relative basal expression among the three species.  
723 Their inferred effect on root growth is indicated by the arrowheads (up for promoting growth

724 and down for suppressing growth). Genes associated with auxin, ABA, and other hormones  
725 were labeled in pink, gold, and black respectively. [C] Root growth examined with and without  
726 salt. [D] Primary root growth, [E] number of lateral roots, and [F] lateral root density of 13-day-  
727 old seedlings that were treated with 150 mM NaCl for 8 days. Data are given as mean  $\pm$  SD ( $n =$   
728 3, at least 7 plants per replicate). Open circles indicate individual measurements. Asterisks  
729 indicate significant differences ( $p \leq 0.05$ ) between treated samples and their respective control  
730 samples, determined by one-way ANOVA with post-hoc Tukey's test. [G] Gene co-expression  
731 clusters of differentially expressed ortholog groups (DEOGs) that showed similar expression  
732 pattern in *A. thaliana* and *E. salsugineum* roots compared to a different pattern observed for *S.*  
733 *parvula* under salt stress. Left panel includes DEOGs that are uniquely upregulated in *S. parvula*;  
734 right panel includes DEOGs that are co-upregulated in *A. thaliana* and *E. salsugineum*. The  
735 average gene expression at each condition is indicated by a dot and connected by a black line  
736 for each species. Individual gene expression is indicated by grey lines.

737 **Figure 5.** Coordination between differentially expressed genes (DEGs) and differently abundant  
738 metabolites (DAMs) during responses to salt in *Arabidopsis thaliana*, *Schrenkiella parvula*, and  
739 *Eutrema salsugineum*. [A] The difference in the percentage of DEGs and DAMs in response to  
740 salt treatments. [B] Percentage of DEGs and DAMs involved in the metabolism of amino acids,  
741 sugars, and their immediate derivatives. DEGs were categorized based on their GO annotations:  
742 GO:0006520 for cellular amino acid metabolism and GO:0005975 for carbohydrate metabolism.  
743 Selected pathways in [C] amino acid and [D] sugar metabolism with concordant DAMs and  
744 DEGs. Line graphs represent normalized log<sub>2</sub> relative metabolite abundance. Boxplots  
745 represent normalized gene expression values. Center line in the boxplots indicates median; box  
746 indicates interquartile range (IQR); whiskers show  $1.5 \times$  IQR. Asterisks indicate significant  
747 difference between the treated samples and their respective controls ( $n = 3-4$ ). Early (E) and  
748 late (L) responses for transcripts refer to 3 and 24 hr, respectively. E and L responses for  
749 metabolites refer to 24 and 72 hr, respectively. Metabolites are shown in the backbone of the  
750 pathway while genes encoding for key enzymes/transcription factors are placed next to the  
751 arrows. Metabolites that were quantified in the current study are given in black while those not  
752 quantified are in grey.

753 **Figure 6.** Transcriptomic support for Na and nutrient transport in *Arabidopsis thaliana*,  
754 *Schrenkiella parvula*, and *Eutrema salsugineum*. [A] Basal expression comparison of genes  
755 encoding putative Na/K transporters and channels in the roots. The dashed lines indicate 2-fold  
756 differences in gene expression between the extremophytes and *A. thaliana* to highlight genes  
757 either highly suppressed or highly induced in the extremophytes in roots at control conditions.  
758 [B] Expression changes of transporters/channels associated with Na/K transport activity during  
759 salt treatments. [C] Selected cation transporters that showed a higher gene copy number in  
760 extremophytes and their expression during salt treatments. Nodes assigned with species colors  
761 show the ortholog network. Edges show homology relationships, either co-linear reciprocal  
762 orthologs (cl-rc), co-linear unidirectional orthologs (cl-uni), transposed -unidirectional  
763 duplicates (tr-uni), or tandem duplicated-unidirectional paralogs (td-uni). RPKM: reads per  
764 kilobase of transcript per million reads mapped. Asterisks indicate significant difference  
765 between the salt treated samples and their respective controls (n = 3, at least 4 plants per  
766 replicate) at \* $p$ -adj  $\leq$  0.05 and \*\* $p$ -adj  $\leq$  0.01. [D] Salt-induced changes in the expression of  
767 genes associated with the transport of nutrients altered in the ionome (identified in Figure 3C).  
768 Sample names are shown on the left indicating treatment concentrations (150 and 250 mM  
769 NaCl) and durations (3 and 24 hr).

770 **Figure 7.** Focal responses to salt stress prevalent in roots of extremophytes compared to *A.*  
771 *thaliana* through ionomic, metabolomic and transcriptomic adjustments coupled to root  
772 growth. Ionomic balance is highlighted for Na, K, and Ca . Data are mean  $\pm$  SD (n  $\geq$  4, at least 4  
773 plants per replicate). Significant differences between treatment groups were determined by  
774 ANOVA with Tukey's test within species. Asterisks indicate significant difference ( $p \leq$  0.05)  
775 between the treated samples and their respective controls. Open circles indicate the biological  
776 replicates. Top 9 metabolites enriched in the extremophytes. Fru, fructose; Asn, asparagine;  
777 Raf, raffinose; DHA, dehydroascorbic acid; Pro, proline; Shkm, shikimic acid; Suc, sucrose;  
778 GABA, gamma-aminobutyric acid; Gln, glutamine. Relative expression changes associated with  
779 ion transport and stress signaling. *KEA5*, K efflux antiporter 5; *KUP9*, K uptake permease 9;  
780 *KAT1*, K channel in *Arabidopsis thaliana* 1; *GLRs*, glutamate-like receptors; *NHX1/2*, Na/H  
781 exchanger1/2; *V-ATPases*, vacuoles-ATPases; *SOS1*, salt overly sensitive 1; *GORK*, gated

782 outwardly-rectifying K channel. Relative root growth compared to control root growth in *A.*  
783 *thaliana*.

784 **Table 1.** Cellular processes enriched among ortholog clusters identified based on their basal  
785 expression levels in shoots (S) and roots (R) of *S. parvula* (purple), *E. salsugineum* (red), and *A.*  
786 *thaliana* (green).

787

### 788 **Supplementary figure captions**

789 **Figure S1.** Effect of salt stress on *Schrenkiella parvula* (Sp), *Eutrema salsugineum* (Es), and  
790 *Arabidopsis thaliana* (At). [A] Four-week-old hydroponically grown plants and the salt  
791 concentrations examined in this study. DAT: Days after treatment. [B] Sampling scheme for  
792 ionic, metabolomic, and transcriptomic profiling. There were at least 4 replicates per  
793 condition used for ionic and metabolomic profiling, and 3 replicates per condition for  
794 transcriptomic profiling with at least 4 plants included per replicate.

795 **Figure S2.** Overall metabolic adjustments in the shoots of the extremophytes compared to *A.*  
796 *thaliana*. [A] Pairwise Pearson correlations of the abundance of 716 quantified metabolites  
797 across all conditions and species. Blue dots indicate 182 metabolites with known structures, and  
798 grey dots represent 534 unknown metabolites. [B] Number of metabolites that significantly  
799 changed in abundance (DAMs) in each species compared to its respective control. [C] Basal level  
800 percent abundances of sugars, amino acids, and their derivatives in the three species.  
801 Significant differences were determined by one-way ANOVA with post-hoc Tukey's test at  $p \leq$   
802 0.05 ( $n = 4$ , at least 4 plants per replicate).

803 **Figure S3.** Pairwise comparison of transcriptomes of *Schrenkiella parvula*, *Eutrema salsugineum*,  
804 and *Arabidopsis thaliana* during response to salt treatments. Pearson correlations of [A] root  
805 and [B] shoot transcriptomes were calculated using differentially expressed ortholog pairs which  
806 included DEGs from at least one condition in one species. The axis labels are composed of  
807 species, treatment concentrations, and treatment durations. Axis color codes represent *S.*  
808 *parvula* (Sp) in purple, *E. salsugineum* (Es) in red, and *A. thaliana* (At) in green. Treatment  
809 concentrations include 150 and 250 mM NaCl; treatment durations include 3 and 24 hr.

810 **Figure S4.** Functional processes in subclusters of the largest functional cluster (response to  
811 stresses) shown in Figure 3C. [A] Root RC1 cluster and its sub-clusters. [B] Shoot SC1 cluster and  
812 its sub-clusters. Similarity between functional clusters are based on overlap coefficient  
813 determined using GOMCL. Cumulative gene representation for sub-clusters in RC1 and SC1 for  
814 [C] roots and [D] shoots. Differentially expressed ortholog groups (DEOGs) are counted for  
815 cumulative representation in each subcluster. RC: root cluster; SC: shoot cluster.

816 **Figure S5.** Species dependent responses to salt treatments in *Schrenkiella parvula* and *Eutrema*  
817 *salsugineum*. Differentially expressed genes (DEGs) in *S. parvula* [A] root and [B] shoot and *E.*  
818 *salsugineum* [C] root and [D] shoot in response to 150 and 250 mM NaCl stress at 3 and 24 hr.  
819 Yellow points in each panel show DEGs that were uniquely differentially expressed at 250 mM  
820 NaCl treatments. Functionally enriched processes for these unique DEGs are shown in the  
821 horizontal bar graphs given as insets outlined in yellow for each panel. Differentially expressed  
822 genes were identified at  $p\text{-adj} \leq 0.01$  ( $n = 3$ , at least 4 plants per replicate).

823 **Figure S6.** Expression of orthologs associated with hormonal signaling pathways in response to  
824 salt in *Arabidopsis thaliana* (At), *Schrenkiella parvula* (Sp), and *Eutrema salsugineum* (Es). Genes  
825 were selected based on their KEGG annotations. Only genes that were significantly different at  
826 either basal expression among species or under salt treatments compared to the control are  
827 shown.

828 **Figure S7.** Lateral root development gene network adapted from De Rybel et al., 2010<sup>32</sup> and  
829 Banda et al., 2019<sup>33</sup>. The expression levels of orthologs (in black) were represented as high (H),  
830 medium (M), or low (L) relative to each other at basal expression in each ortholog group.  
831 Regulatory pathways that were consistently modulated in *S. parvula* or *E. salsugineum* implied  
832 to inhibit lateral root formation are marked in turquoise ribbons. Expression pathway leading to  
833 the induction of lateral root formation in *A. thaliana* is highlighted in gold ribbons. Genes in the  
834 network that were not differently expressed among the three species are marked in light grey.

835 **Figure S8.** *Eutrema salsugineum*, *Schrenkiella parvula*, and *Arabidopsis thaliana* seedlings  
836 treated with 150 mM NaCl for 11 days. *Schrenkiella parvula* (Sp) promoted uninterrupted  
837 primary root growth while *E. salsugineum* (Es) showed slower primary root growth with  
838 reduced lateral root number. *A. thaliana* (At) roots showed severe primary and lateral root

839 growth inhibition under salt stress.

840 **Figure S9.** Overall concordant metabolomic and transcriptomic responses and proline, shikimic  
841 acid, and ascorbic acid pathway alignments between genes and metabolites. [A] Percentage of  
842 differentially expressed genes (DEGs) and differently abundant metabolites (DAMs) in response  
843 to salt treatments. Pathways involved in [B] proline metabolism, [C] the conversion from  
844 phosphoenolpyruvate to chorismite, and [D] ascorbic acid metabolism. Line graphs represent  
845 normalized log<sub>2</sub> relative metabolite abundance. Boxplots represent normalized gene expression  
846 values. Center line in the boxplots indicate median; box indicates interquartile range (IQR);  
847 whiskers show 1.5 × IQR. Asterisks indicate significant difference between the treated samples  
848 and their respective controls (n = 3-4). Early (E) and late (L) responses for transcripts refer to 3  
849 and 24 hr, respectively. E and L responses for metabolites refer to 24 and 72 hr, respectively.  
850 Metabolites are shown in the backbone of the pathway while genes encoding for key  
851 enzymes/transcription factors are placed next to the arrows. Metabolites that were quantified  
852 in the current study are given in black while those not quantified are in grey.

853

## 854 **References**

- 855 1. Flowers, T. J., Munns, R. & Colmer, T. D. Sodium chloride toxicity and the cellular basis of  
856 salt tolerance in halophytes. *Ann. Bot.* **115**, 419–431 (2015).
- 857 2. Santiago-Rosario, L. Y., Harms, K. E., Elderd, B. D., Hart, P. B. & Dassanayake, M. No  
858 escape: The influence of substrate sodium on plant growth and tissue sodium responses.  
859 *Ecol. Evol.* **11**, 14231–14249 (2021).
- 860 3. Flowers, T. J. & Colmer, T. D. Salinity tolerance in halophytes. *New Phytol.* **179**, 945–963  
861 (2008).
- 862 4. Hajiboland, R., Bahrami-Rad, S., Akhiani, H. & Poschenrieder, C. Salt tolerance  
863 mechanisms in three Irano-Turanian Brassicaceae halophytes relatives of *Arabidopsis*  
864 *thaliana*. *J. Plant Res.* **131**, 1029–1046 (2018).
- 865 5. Oh, D.-H., Dassanayake, M., Bohnert, H. J. & Cheeseman, J. M. Life at the extreme:  
866 lessons from the genome. *Genome Biol* **13**, 241 (2012).
- 867 6. Kazachkova, Y. *et al.* Halophytism: What Have We Learnt From *Arabidopsis thaliana*

- 868 Relative Model Systems? *Plant Physiol.* **178**, 972–988 (2018).
- 869 7. Pantha, P. & Dassanayake, M. Living with Salt. *Innov.* **1**, 100050 (2020).
- 870 8. Zhao, C., Zhang, H., Song, C., Zhu, J. & Shabala, S. Mechanisms of Plant Responses and  
871 Adaptation to Soil Salinity. *Innov.* **1**, 100017 (2020).
- 872 9. van Zelm, E., Zhang, Y. & Testerink, C. Salt Tolerance Mechanisms of Plants. *Annu. Rev.*  
873 *Plant Biol.* **71**, 403–433 (2020).
- 874 10. Takahashi, F. & Shinozaki, K. Long-distance signaling in plant stress response. *Curr. Opin.*  
875 *Plant Biol.* **47**, 106–111 (2019).
- 876 11. Takahashi, Y. *et al.* MAP3Kinase-dependent SnRK2-kinase activation is required for  
877 abscisic acid signal transduction and rapid osmotic stress response. *Nat. Commun.* **11**, 12  
878 (2020).
- 879 12. Flowers, T. J., Galal, H. K. & Bromham, L. Evolution of halophytes: multiple origins of salt  
880 tolerance in land plants. *Funct. Plant Biol.* **37**, 604 (2010).
- 881 13. Bennett, T. H., Flowers, T. J. & Bromham, L. Repeated evolution of salt-tolerance in  
882 grasses. *Biol. Lett.* **9**, 20130029 (2013).
- 883 14. Isayenkov, S. V. & Maathuis, F. J. M. Plant Salinity Stress: Many Unanswered Questions  
884 Remain. *Front. Plant Sci.* **10**, 80 (2019).
- 885 15. Dassanayake, M. *et al.* The genome of the extremophile crucifer *Thellungiella parvula*.  
886 *Nat. Genet.* **43**, 913–918 (2011).
- 887 16. Wu, H.-J. *et al.* Insights into salt tolerance from the genome of *Thellungiella salsuginea*.  
888 *Proc. Natl. Acad. Sci.* **109**, 12219–12224 (2012).
- 889 17. Inan, G. *et al.* Salt Cress. A Halophyte and Cryophyte *Arabidopsis* Relative Model System  
890 and Its Applicability to Molecular Genetic Analyses of Growth and Development of  
891 Extremophiles. *Plant Physiol.* **135**, 1718–1737 (2004).
- 892 18. Orsini, F. *et al.* A comparative study of salt tolerance parameters in 11 wild relatives of  
893 *Arabidopsis thaliana*. *J. Exp. Bot.* **61**, 3787–3798 (2010).
- 894 19. Tug, G. N., Yaprak, A. E. & Vural, M. The Floristical, Ecological, and Syntaxonomical  
895 Characteristics of Salt Marshes and Salt Steppes in Turkey. in *Sabkha Ecosystems* 413–  
896 446 (Springer, 2019). doi:10.1007/978-3-030-04417-6\_26.

- 897 20. Lee, Y. P. *et al.* Salt stress responses in a geographically diverse collection of  
898 *Eutrema/Thellungiella* spp. accessions. *Funct. Plant Biol.* **43**, 590–606 (2016).
- 899 21. Gong, Q., Li, P., Ma, S., Indu Rupassara, S. & Bohnert, H. J. Salinity stress adaptation  
900 competence in the extremophile *Thellungiella halophila* in comparison with its relative  
901 *Arabidopsis thaliana*. *Plant J.* **44**, 826–839 (2005).
- 902 22. Kazachkova, Y. *et al.* Growth Platform-Dependent and -Independent Phenotypic and  
903 Metabolic Responses of *Arabidopsis* and Its Halophytic Relative, *Eutrema salsugineum*, to  
904 Salt Stress. *Plant Physiol.* **162**, 1583–1598 (2013).
- 905 23. Oh, D.-H. *et al.* Genome Structures and Transcriptomes Signify Niche Adaptation for the  
906 Multiple-Ion-Tolerant Extremophyte *Schrenkiella parvula*. *Plant Physiol.* **164**, 2123–2138  
907 (2014).
- 908 24. Prerostova, S. *et al.* Hormonal dynamics during salt stress responses of salt-sensitive  
909 *Arabidopsis thaliana* and salt-tolerant *Thellungiella salsuginea*. *Plant Sci.* **264**, 188–198  
910 (2017).
- 911 25. Shabala, S. *et al.* Extracellular Ca<sup>2+</sup> ameliorates NaCl-induced K<sup>+</sup> loss from *Arabidopsis*  
912 root and leaf cells by controlling plasma membrane K<sup>+</sup>-permeable channels. *Plant*  
913 *Physiol.* **141**, 1653–1665 (2006).
- 914 26. Slama, I., Abdelly, C., Bouchereau, A., Flowers, T. & Saviouré, A. Diversity, distribution and  
915 roles of osmoprotective compounds accumulated in halophytes under abiotic stress.  
916 *Ann. Bot.* **115**, 433–447 (2015).
- 917 27. Yu, Z. *et al.* How Plant Hormones Mediate Salt Stress Responses. *Trends Plant Sci.* **25**,  
918 1117–1130 (2020).
- 919 28. Gallei, M., Luschnig, C. & Friml, J. Auxin signalling in growth: Schrödinger’s cat out of the  
920 bag. *Curr. Opin. Plant Biol.* **53**, 43–49 (2020).
- 921 29. Hauser, F., Waadt, R. & Schroeder, J. I. Evolution of Abscisic Acid Synthesis and Signaling  
922 Mechanisms. *Curr. Biol.* **21**, R346–R355 (2011).
- 923 30. Ding, Z. & De Smet, I. Localised ABA signalling mediates root growth plasticity. *Trends*  
924 *Plant Sci.* **18**, 533–535 (2013).
- 925 31. Ding, Z. J. *et al.* Transcription factor WRKY46 modulates the development of *Arabidopsis*



- 926 lateral roots in osmotic/salt stress conditions via regulation of ABA signaling and auxin  
927 homeostasis. *Plant J.* **84**, 56–69 (2015).
- 928 32. De Rybel, B. *et al.* A Novel Aux/IAA28 Signaling Cascade Activates GATA23-Dependent  
929 Specification of Lateral Root Founder Cell Identity. *Curr. Biol.* **20**, 1697–1706 (2010).
- 930 33. Banda, J. *et al.* Lateral Root Formation in Arabidopsis: A Well-Ordered LReXit. *Trends*  
931 *Plant Sci.* **24**, 826–839 (2019).
- 932 34. Zhu, X. *et al.* K<sup>+</sup> Efflux Antiporters 4, 5, and 6 Mediate pH and K<sup>+</sup> Homeostasis in  
933 Endomembrane Compartments. *Plant Physiol.* **178**, 1657–1678 (2018).
- 934 35. Sustr, M., Soukup, A. & Tylova, E. Potassium in Root Growth and Development. *Plants* **8**,  
935 435 (2019).
- 936 36. Bassil, E. *et al.* The Arabidopsis Na<sup>+</sup>/H<sup>+</sup> Antiporters NHX1 and NHX2 Control Vacuolar pH  
937 and K<sup>+</sup> Homeostasis to Regulate Growth, Flower Development, and Reproduction. *Plant*  
938 *Cell* **23**, 3482–3497 (2011).
- 939 37. Halfter, U., Ishitani, M. & Zhu, J.-K. The Arabidopsis SOS2 protein kinase physically  
940 interacts with and is activated by the calcium-binding protein SOS3. *Proc. Natl. Acad. Sci.*  
941 **97**, 3735–3740 (2000).
- 942 38. Demidchik, V. & Tester, M. Sodium Fluxes through Nonselective Cation Channels in the  
943 Plasma Membrane of Protoplasts from Arabidopsis Roots. *Plant Physiol.* **128**, 379–387  
944 (2002).
- 945 39. Han, S., Wang, C., Wang, W. & Jiang, J. Mitogen-activated protein kinase 6 controls root  
946 growth in Arabidopsis by modulating Ca<sup>2+</sup>-based Na<sup>+</sup> flux in root cell under salt stress. *J.*  
947 *Plant Physiol.* **171**, 26–34 (2014).
- 948 40. Volkov, V. & Amtmann, A. *Thellungiella halophila*, a salt-tolerant relative of Arabidopsis  
949 thaliana, has specific root ion-channel features supporting K<sup>+</sup>/Na<sup>+</sup> homeostasis under  
950 salinity stress. *Plant J.* **48**, 342–353 (2006).
- 951 41. Cuin, T. A., Betts, S. A., Chalmandrier, R. & Shabala, S. A root's ability to retain K<sup>+</sup>  
952 correlates with salt tolerance in wheat. *J. Exp. Bot.* **59**, 2697–2706 (2008).
- 953 42. Sun, J. *et al.* Calcium mediates root K<sup>+</sup>/Na<sup>+</sup> homeostasis in poplar species differing in salt  
954 tolerance. *Tree Physiol.* **29**, 1175–1186 (2009).

- 955 43. Ivashikina, N. *et al.* K<sup>+</sup> channel profile and electrical properties of Arabidopsis root hairs.  
956 *FEBS Lett.* **508**, 463–469 (2001).
- 957 44. Shabala, S. & Cuin, T. A. Potassium transport and plant salt tolerance. *Physiol. Plant.* **133**,  
958 651–669 (2008).
- 959 45. Ache, P. *et al.* GORK, a delayed outward rectifier expressed in guard cells of Arabidopsis  
960 thaliana, is a K<sup>(+)</sup>-selective, K<sup>(+)</sup>-sensing ion channel. *FEBS Lett.* **486**, 93–8 (2000).
- 961 46. Philippar, K. *et al.* Auxin activates KAT1 and KAT2, two K<sup>+</sup>-channel genes expressed in  
962 seedlings of Arabidopsis thaliana. *Plant J.* **37**, 815–827 (2004).
- 963 47. Sun, Y. *et al.* Divergence in a stress regulatory network underlies differential growth  
964 control. *bioRxiv* (2021) doi:10.1101/2020.11.18.349449.
- 965 48. Zhang, M. *et al.* KUP9 maintains root meristem activity by regulating K<sup>+</sup> and auxin  
966 homeostasis in response to low K. *EMBO Rep.* **21**, e50164 (2020).
- 967 49. Eshel, G. *et al.* Anastatica hierochuntica, an Arabidopsis Desert Relative, Is Tolerant to  
968 Multiple Abiotic Stresses and Exhibits Species-Specific and Common Stress Tolerance  
969 Strategies with Its Halophytic Relative, Eutrema (Thellungiella) salsugineum. *Front. Plant*  
970 *Sci.* **7**, 1–18 (2017).
- 971 50. Yin, J., Gosney, M. J., Dilkes, B. P. & Mickelbart, M. V. Dark period transcriptomic and  
972 metabolic profiling of two diverse Eutrema salsugineum accessions. *Plant Direct* **2**,  
973 e00032 (2018).
- 974 51. Pinheiro, C. *et al.* Distinctive phytohormonal and metabolic profiles of Arabidopsis  
975 thaliana and Eutrema salsugineum under similar soil drying. *Planta* **249**, 1417–1433  
976 (2019).
- 977 52. Bartels, D. & Dinakar, C. Balancing salinity stress responses in halophytes and non-  
978 halophytes: a comparison between Thellungiella and Arabidopsis thaliana. *Funct. Plant*  
979 *Biol.* **40**, 819 (2013).
- 980 53. Funck, D., Eckard, S. & Müller, G. Non-redundant functions of two proline dehydrogenase  
981 isoforms in Arabidopsis. *BMC Plant Biol.* **10**, 70 (2010).
- 982 54. Déjardin, A., Sokolov, L. N. & Kleczkowski, L. A. Sugar/osmoticum levels modulate  
983 differential abscisic acid-independent expression of two stress-responsive sucrose

- 984 synthase genes in Arabidopsis. *Biochem. J.* **344**, 503–509 (1999).
- 985 55. Grime, J. & Hunt, R. Relative Growth-Rate : Its Range and Adaptive Significance in a Local  
986 Flora. *J. Ecol.* **63**, 393–422 (1975).
- 987 56. Poorter, H. Interspecific variation in relative growth rate: on ecological causes and  
988 physiological consequences. *Causes consequences Var. growth rate Product. High. plants*  
989 **24**, 45–68 (1989).
- 990 57. Atkinson, R. R. L., Burrell, M. M., Osborne, C. P., Rose, K. E. & Rees, M. A non-targeted  
991 metabolomics approach to quantifying differences in root storage between fast- and  
992 slow-growing plants. *New Phytol.* **196**, 200–211 (2012).
- 993 58. Tran, K.-N. *et al.* Balancing growth amidst salinity stress – lifestyle perspectives from the  
994 extremophyte model *Schrenkiella parvula*. *bioRxiv* 6 (2021)  
995 doi:<https://doi.org/10.1101/2021.08.27.457575>.
- 996 59. Wang, Y., Li, K. & Li, X. Auxin redistribution modulates plastic development of root  
997 system architecture under salt stress in *Arabidopsis thaliana*. *J. Plant Physiol.* **166**, 1637–  
998 1645 (2009).
- 999 60. Lakehal, A. *et al.* A Molecular Framework for the Control of Adventitious Rooting by  
1000 TIR1/AFB2-Aux/IAA-Dependent Auxin Signaling in Arabidopsis. *Mol. Plant* **12**, 1499–1514  
1001 (2019).
- 1002 61. Simopoulos, C. M. A. *et al.* Coding and long non-coding RNAs provide evidence of distinct  
1003 transcriptional reprogramming for two ecotypes of the extremophile plant *Eutrema*  
1004 *salsugineum* undergoing water deficit stress. *BMC Genomics* **21**, 396 (2020).
- 1005 62. Wang, G. *et al.* Cross species multi-omics reveals cell wall sequestration and elevated  
1006 global transcript abundance as mechanisms of boron tolerance in plants. *New Phytol.*  
1007 **230**, 1985–2000 (2021).
- 1008 63. Pantha, P., Oh, D.-H., Longstreth, D. & Dassanayake, M. Living with high potassium: an  
1009 asset or a hindrance. *bioRxiv* 2021.07.01.450778 (2021) doi:10.1101/2021.07.01.450778.
- 1010 64. Flowers, T. J. & Colmer, T. D. Plant salt tolerance: Adaptations in halophytes. *Ann. Bot.*  
1011 **115**, 327–331 (2015).
- 1012 65. Zandalinas, S. I., Fritschi, F. B. & Mittler, R. Global Warming, Climate Change, and

- 1013 Environmental Pollution: Recipe for a Multifactorial Stress Combination Disaster. *Trends*  
1014 *Plant Sci.* **26**, 588–599 (2021).
- 1015 66. Bailey-Serres, J., Parker, J. E., Ainsworth, E. A., Oldroyd, G. E. D. & Schroeder, J. I. Genetic  
1016 strategies for improving crop yields. *Nature* **575**, 109–118 (2019).
- 1017 67. Pareek, A., Dhankher, O. P. & Foyer, C. H. Mitigating the impact of climate change on  
1018 plant productivity and ecosystem sustainability. *J. Exp. Bot.* **71**, 451–456 (2020).
- 1019 68. Conn, S. J. *et al.* Protocol: Optimising hydroponic growth systems for nutritional and  
1020 physiological analysis of *Arabidopsis thaliana* and other plants. *Plant Methods* **9**, 1–11  
1021 (2013).
- 1022 69. Schneider, C. A., Rasband, W. S. & Eliceiri, K. W. NIH Image to ImageJ: 25 years of image  
1023 analysis. *Nat. Methods* **9**, 671–675 (2012).
- 1024 70. Baxter, I. R. *et al.* Single-Kernel Iomic Profiles Are Highly Heritable Indicators of Genetic  
1025 and Environmental Influences on Elemental Accumulation in Maize Grain (*Zea mays*).  
1026 *PLoS One* **9**, e87628 (2014).
- 1027 71. Fiehn, O. Metabolomics by Gas Chromatography–Mass Spectrometry: Combined  
1028 Targeted and Untargeted Profiling. *Curr. Protoc. Mol. Biol.* **114**, 1–43 (2016).
- 1029 72. Mannor, S. *et al.* K-Means Clustering. in *Encyclopedia of Machine Learning* 563–564  
1030 (Springer US, 2011). doi:10.1007/978-0-387-30164-8\_425.
- 1031 73. Langmead, B., Trapnell, C., Pop, M. & Salzberg, S. Ultrafast and memory-efficient  
1032 alignment of short DNA sequences to the human genome. *Genome Biol.* **10**, R25 (2009).
- 1033 74. Love, M. I., Anders, S. & Huber, W. *Differential analysis of count data - the DESeq2*  
1034 *package*. *Genome Biology* vol. 15 (2014).
- 1035 75. McInnes, L., Healy, J., Saul, N. & Großberger, L. UMAP: Uniform Manifold Approximation  
1036 and Projection. *J. Open Source Softw.* **3**, 861 (2018).
- 1037 76. Maere, S., Heymans, K. & Kuiper, M. BiNGO: A Cytoscape plugin to assess  
1038 overrepresentation of Gene Ontology categories in Biological Networks. *Bioinformatics*  
1039 **21**, 3448–3449 (2005).
- 1040 77. Wang, G., Oh, D. H. & Dassanayake, M. GOMCL: A toolkit to cluster, evaluate, and extract  
1041 non-redundant associations of Gene Ontology-based functions. *BMC Bioinformatics* **21**,

1042 1–9 (2020).

1043 78. Oh, D.-H. & Dassanayake, M. Landscape of gene transposition–duplication within the  
1044 Brassicaceae family. *DNA Res.* **26**, 21–36 (2019).

1045

1046

1047

1048

1049

1050

1051

1052

1053

1054

1055

1056

1057

1058

1059

1060

1061

1062

1063

1064

1065

1066

1067

1068

1069

1070

1071 Main figures and tables

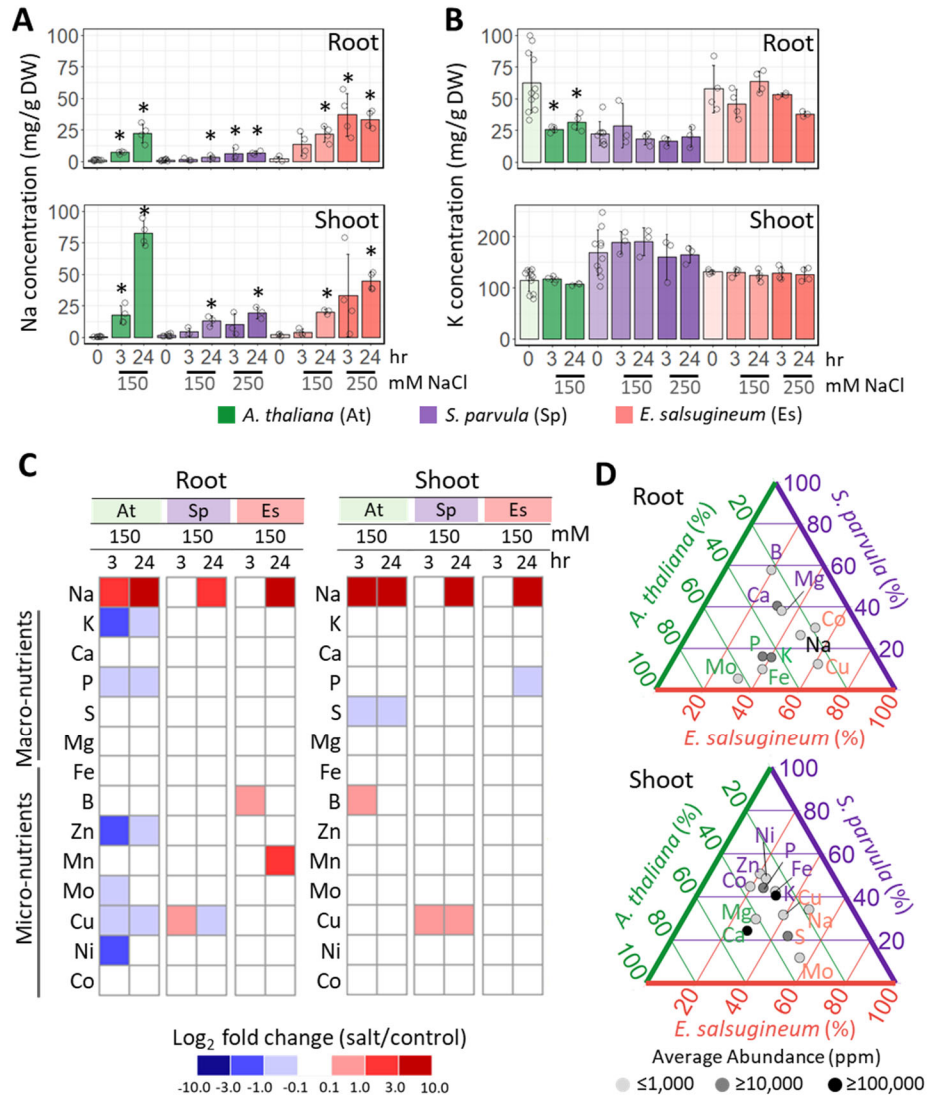

**Figure 1.** Sodium accumulation and its effect on nutrient balance in the extremophytes compared to *A. thaliana* under salt stress. [A] Na and [B] K content in roots and shoots. Data are mean ± SD (n ≥ 4, at least 4 plants per replicate). Significant differences between treatment groups were determined by ANOVA with Tukey's test applied to within species comparisons. Asterisks indicate significant difference ( $p \leq 0.05$ ) between the treated samples and their respective controls. Open circles indicate biological replicates. [C] Salt stress-induced changes in macro- and micro-nutrient content. [D] Percent abundance of nutrients that showed significant differences in abundance at control conditions among the three species. Significant difference in elemental abundance was determined by one-way ANOVA with post-hoc Tukey's test at  $p \leq 0.05$ . The three axes of the ternary plots are marked with *A. thaliana*, *S. parvula*, and *E. salsugineum*. The gridlines in species-designated colors point to % abundance of the element from the corresponding species over the total abundance of that element from all three species. Thus, gridlines of each color nearest to each data point lead to the relative % abundance in each species.

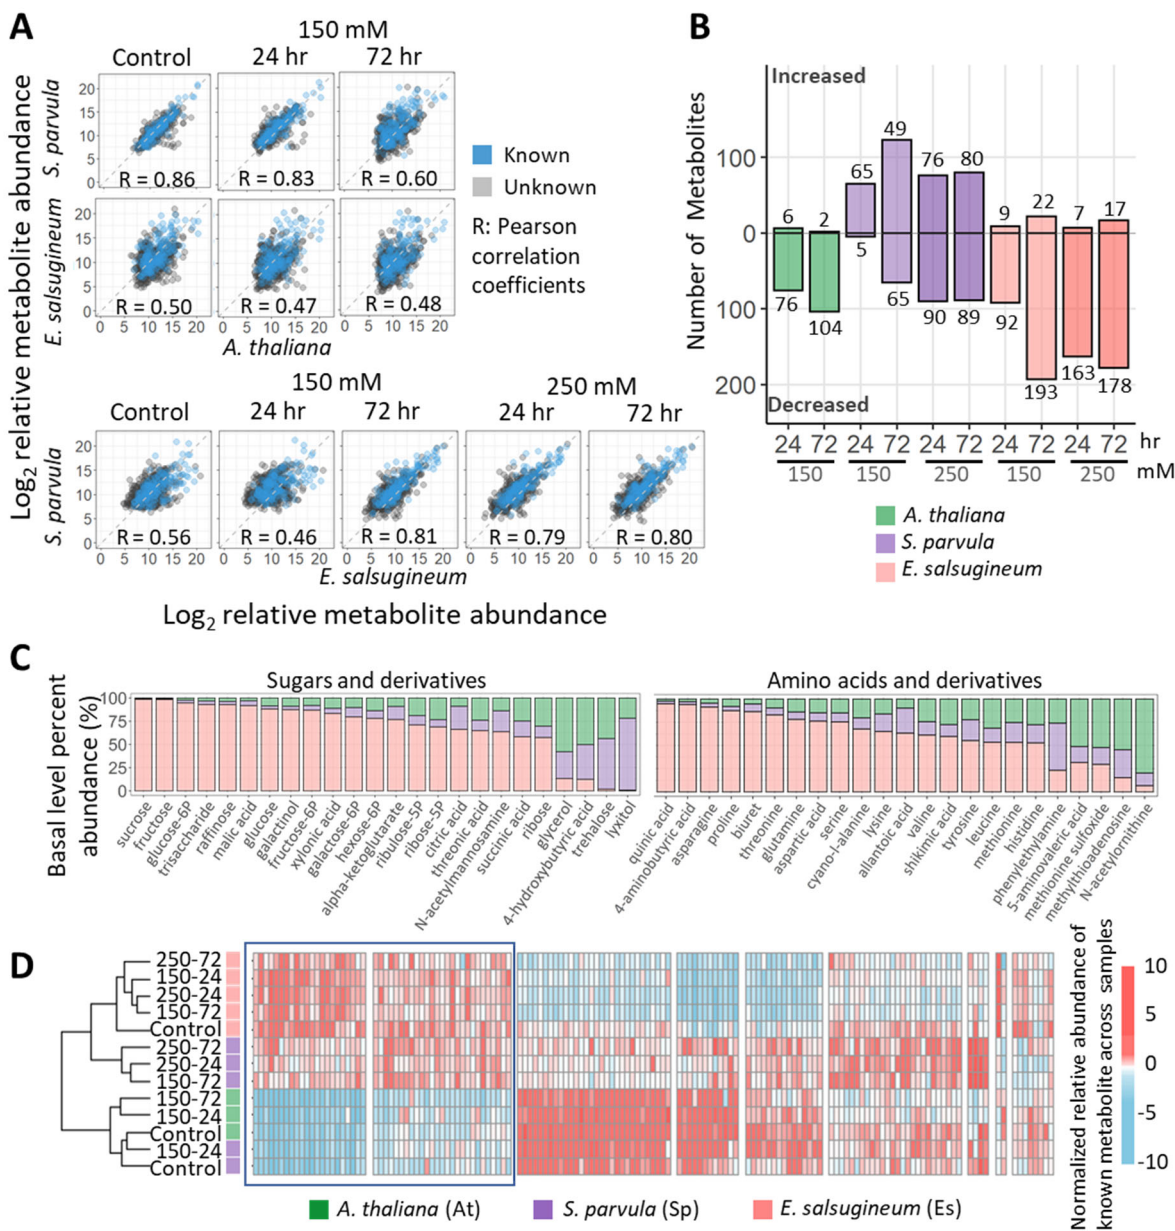

**Figure 2.** Overall metabolic preparedness and adjustments in the roots of the extremophytes compared to *A. thaliana*. [A] Pairwise Pearson correlations of the abundance of 716 quantified metabolites across all conditions and species. Blue dots indicate 182 metabolites with known structures, and grey dots represent 534 unknown metabolites. [B] Number of metabolites that significantly changed in abundance (DAMs) in each species compared to its respective controls. [C] Basal level percent abundances of sugars, amino acids, and their derivatives in the three species. [D] Hierarchical clustering of known metabolites shown in [B and C]. Blue box highlights clusters of interest. Columns indicate metabolites and rows indicate samples. Sample names for treated conditions are given as treatment concentration and duration, separated by a dash. Treatment concentrations are 150 and 250 mM NaCl; treatment durations are 24 and 72 hr. Significant differences were determined by one-way ANOVA with post-hoc Tukey's test at  $p \leq 0.05$  ( $n = 4$ , at least 4 plants per replicate).

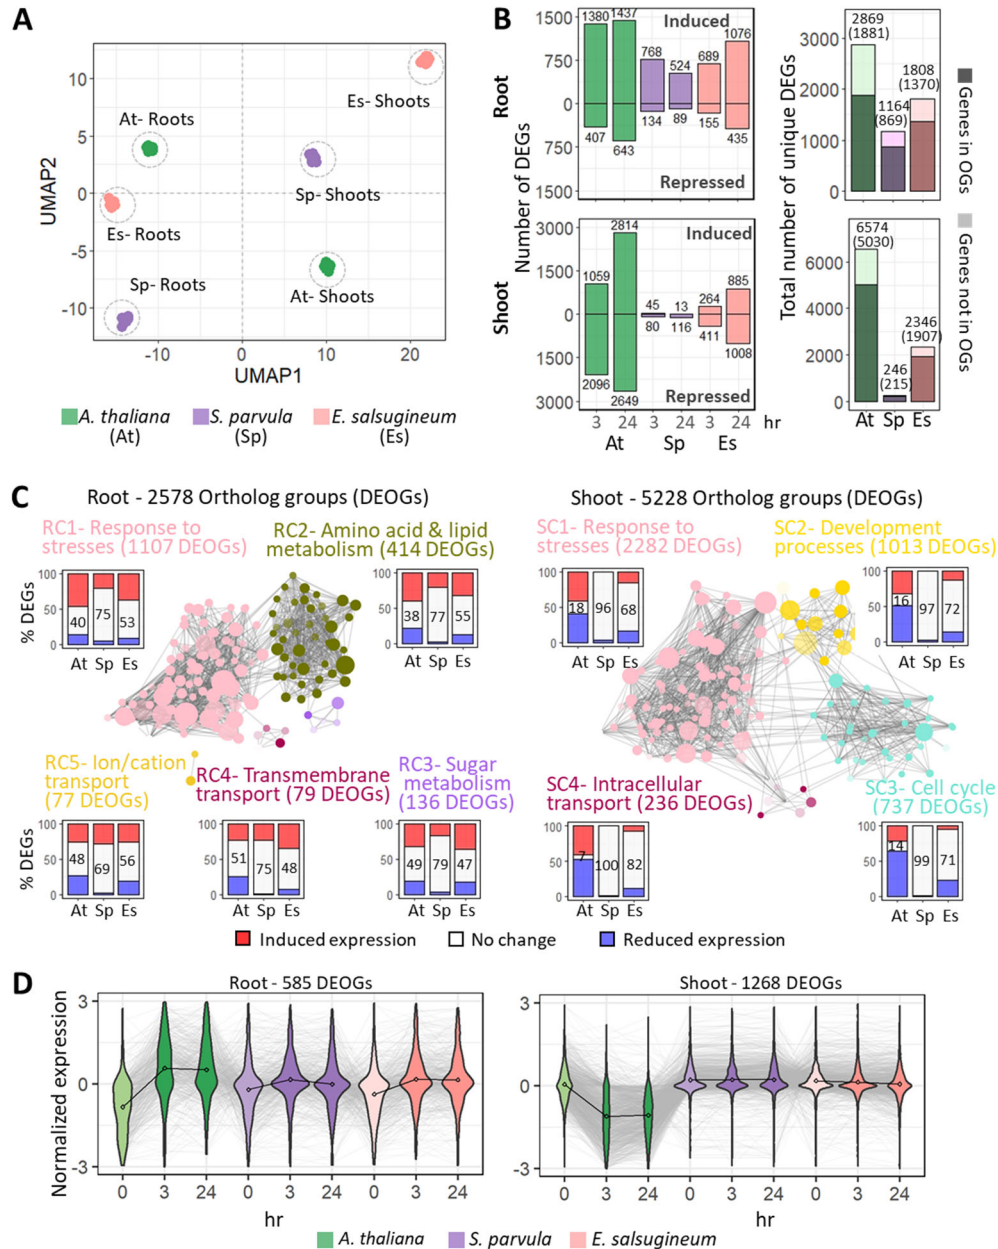

**Figure 3.** Transcriptomic overview of *Schrenkiella parvula*, *Eutrema salsugineum*, and *Arabidopsis thaliana* in response to salt. [A] Overall clustering of transcriptomes in shoots and roots from all replicates in all conditions using one-to-one ortholog groups (OGs). [B] Number of differentially expressed genes (DEGs) in response to salt treatments. DEGs were identified using DESeq2 at  $p\text{-adj} \leq 0.01$  ( $n = 3$ , at least 4 plants per replicate). [C] Functional clusters enriched among differentially expressed ortholog groups (DEOGs) that included a DEG from at least one species in roots (RC, root cluster) and shoots (SC-shoot cluster). Functional annotations were based on GO annotations assigned to DEOGs. The bar graph assigned to each cluster represents percent allocation of induced (red) and suppressed (blue) DEGs with the percentage of genes that did not significantly change in each species given in the white space. [D] Dominant gene expression clusters of DEOGs across time points and species from roots and shoots that included an *A. thaliana* ortholog that was either induced or suppressed in response to 150 mM NaCl treatment. The average gene expression at each condition is indicated by a dot and connected by a black line for each species. Individual gene expression is indicated by grey lines.



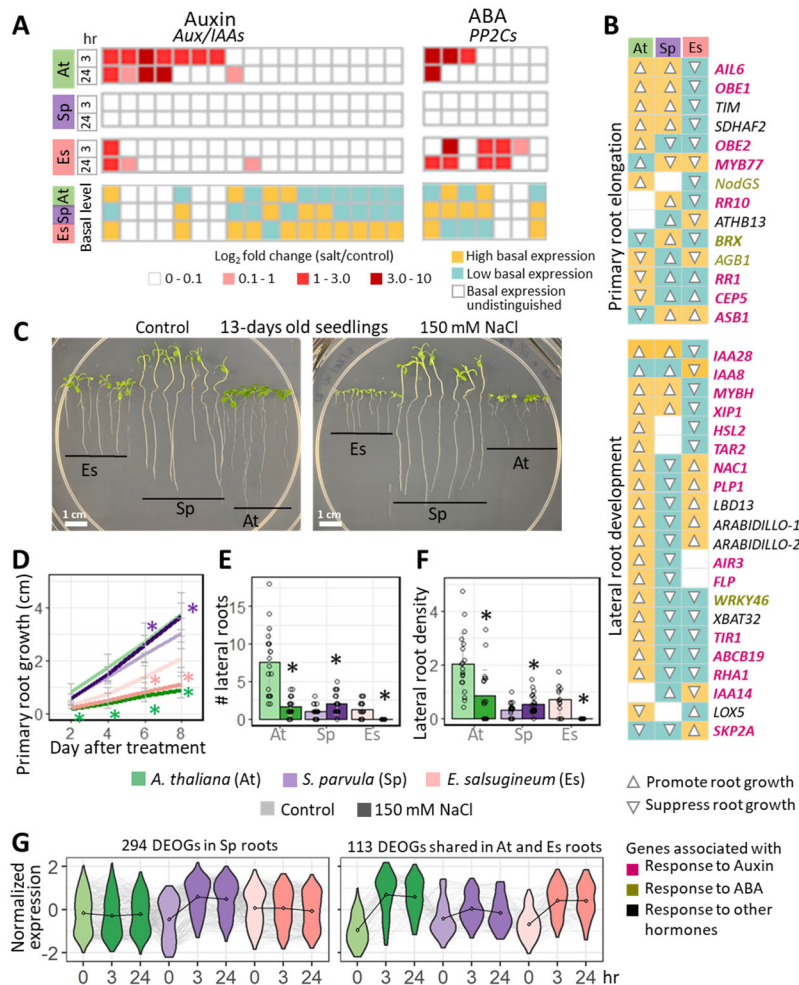

**Figure 4.** Root growth responses in line with gene expression associated with auxin and ABA signaling in *Arabidopsis thaliana*, *Schrenkiella parvula*, and *Eutrema salsugineum* when treated with salt. [A] Salt-induced changes in expression of auxin/indole acetic acid (Aux/IAA) repressors and type 2C protein phosphatases (PP2Cs) that regulate auxin and ABA signaling. [B] Curated genes from lateral root development (GO:0048527) and primary root development (GO:0080022) used to infer root growth phenotypes based on functional genetic studies in *A. thaliana*. Ortholog expression levels are categorized as high (yellow), low (turquoise), and indistinguishable (no-color) based on their relative basal expression among the three species. Their inferred effect on root growth is indicated by the arrowheads (up for promoting DEOG growth and down for suppressing growth). Genes associated with auxin, ABA, and other hormones were labeled in pink, gold, and black respectively. [C] Root growth examined with and without salt. [D] Primary root growth, [E] number of lateral roots, and [F] lateral root density of 13-day-old seedlings that were treated with 150 mM NaCl for 8 days. Data are given as mean  $\pm$  SD ( $n = 3$ , at least 7 plants per replicate). Open circles indicate individual measurements. Asterisks indicate significant differences ( $p \leq 0.05$ ) between treated samples and their respective control samples, determined by one-way ANOVA with post-hoc Tukey's test. [G] Gene co-expression clusters of differentially expressed ortholog groups (DEOGs) that showed similar expression pattern in *A. thaliana* and *E. salsugineum* roots compared to a different pattern observed for *S. parvula* under salt stress. Left panel includes DEOGs that are uniquely upregulated in *S. parvula*; right panel includes DEOGs that are co-upregulated in *A. thaliana* and *E. salsugineum*. The average gene expression at each condition is indicated by a dot and connected by a black line for each species. Individual gene expression is indicated by grey lines.

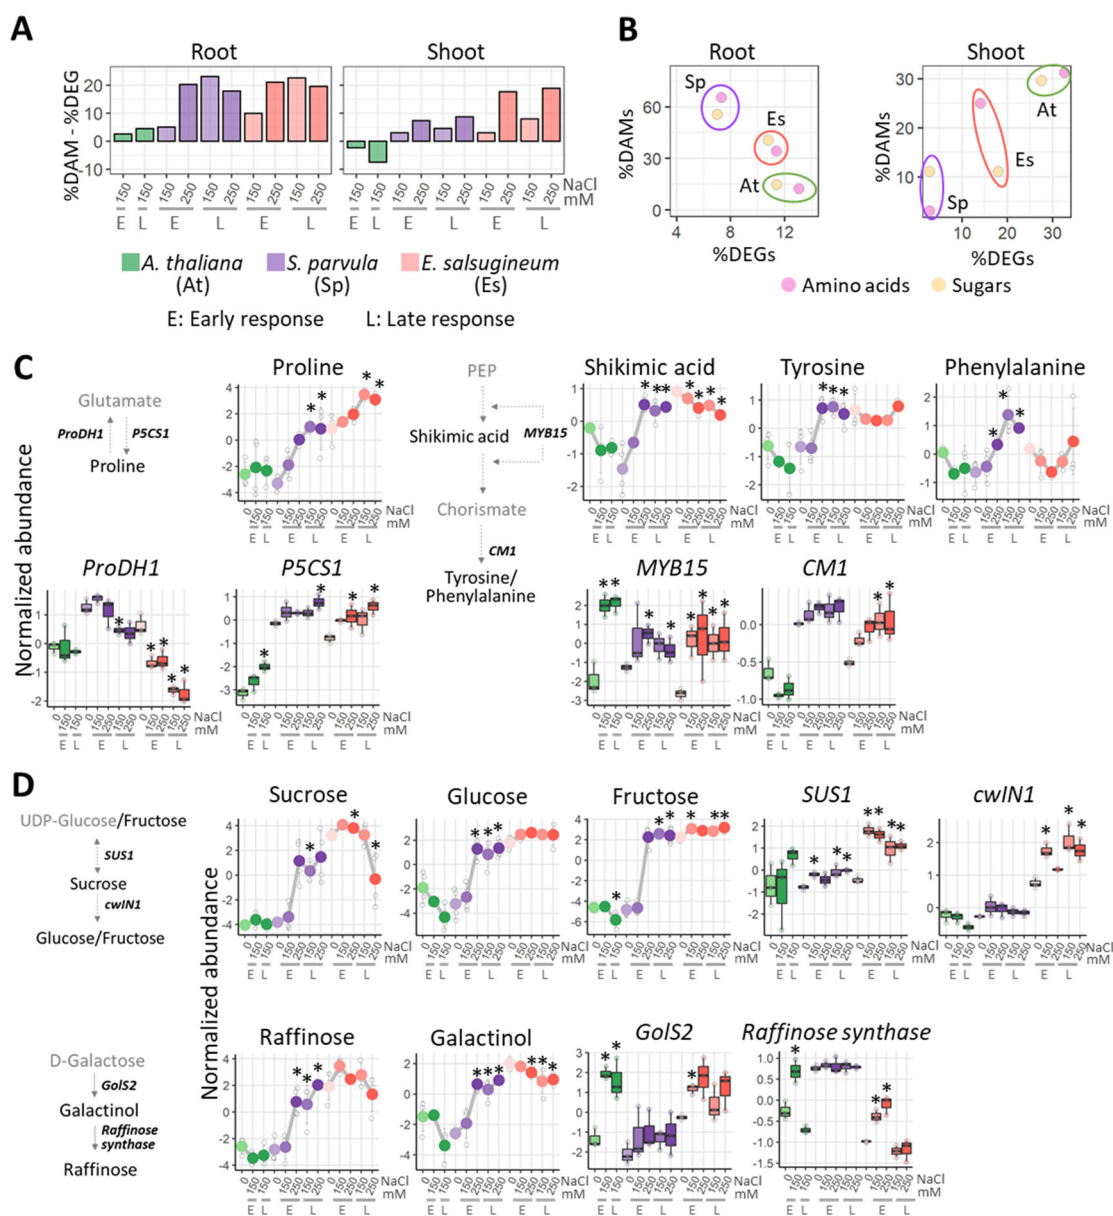

**Figure 5.** Coordination between differentially expressed genes (DEGs) and differently abundant metabolites (DAMs) during responses to salt in *Arabidopsis thaliana*, *Schrenkiella parvula*, and *Eutrema salsugineum*. [A] The difference in the percentage of DEGs and DAMs in response to salt treatments. [B] Percentage of DEGs and DAMs involved in the metabolism of amino acids, sugars, and their immediate derivatives. DEGs were categorized based on their GO annotations: GO:0006520 for cellular amino acid metabolism and GO:0005975 for carbohydrate metabolism. Selected pathways in [C] amino acid and [D] sugar metabolism with concordant DAMs and DEGs. Line graphs represent normalized log<sub>2</sub> relative metabolite abundance. Boxplots represent normalized gene expression values. Center line in the boxplots indicates median; box indicates interquartile range (IQR); whiskers show 1.5 × IQR. Asterisks indicate significant difference between the treated samples and their respective controls (n = 3-4). Early (E) and late (L) responses for transcripts refer to 3 and 24 hr, respectively. E and L responses for metabolites refer to 24 and 72 hr, respectively. Metabolites are shown in the backbone of the pathway while genes encoding for key enzymes/transcription factors are placed next to the arrows. Metabolites that were quantified in the current study are given in black while those not quantified are in grey.

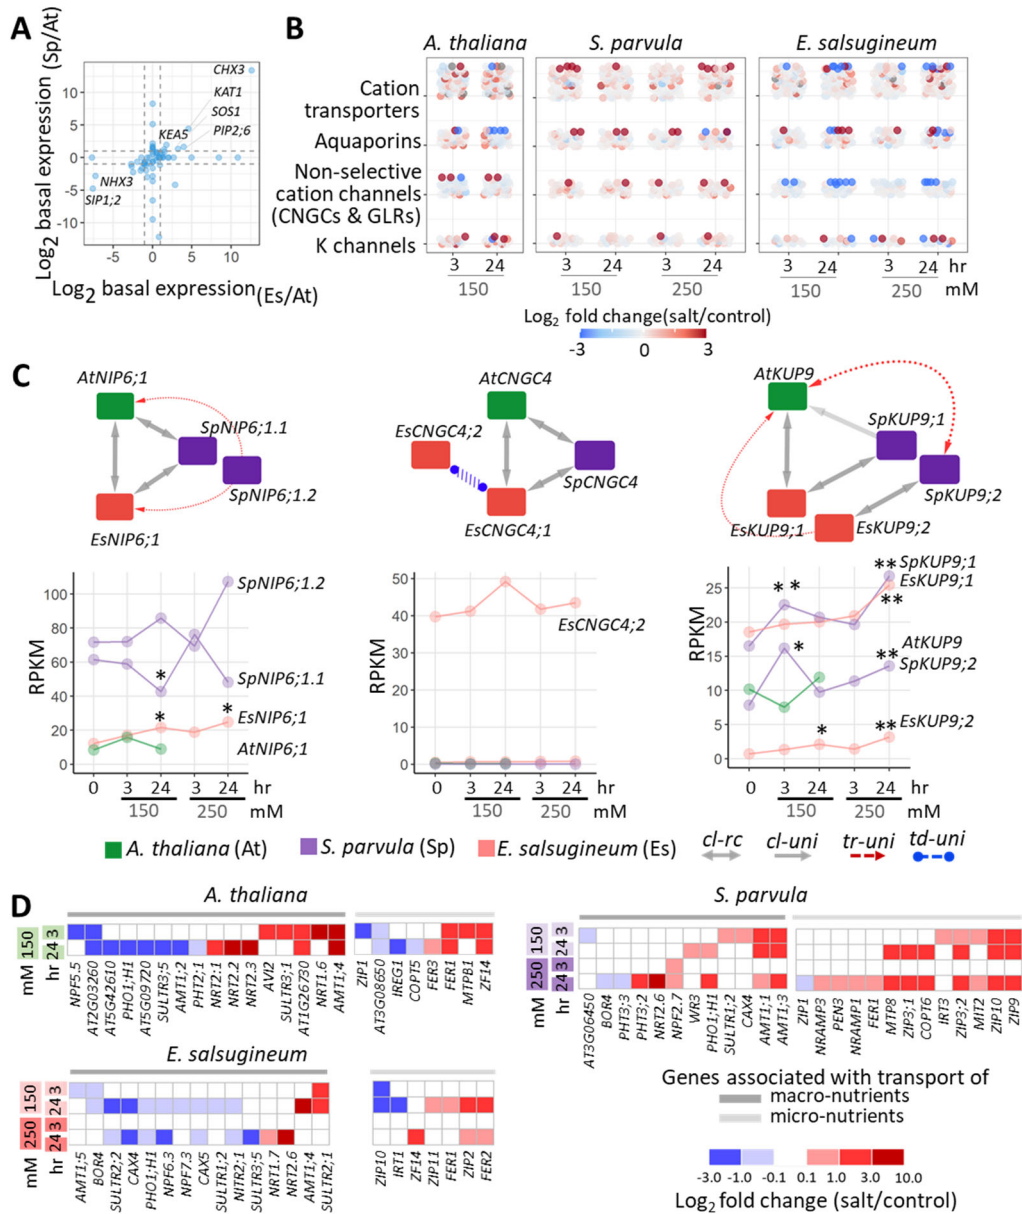

**Figure 6.** Transcriptomic support for Na and nutrient transport in *Arabidopsis thaliana*, *Schrenkiella parvula*, and *Eutrema salsugineum*. [A] Basal expression comparison of genes encoding putative Na/K transporters and channels in the roots. The dashed lines indicate 2-fold differences in gene expression between the extremophytes and *A. thaliana* to highlight genes either highly suppressed or highly induced in the extremophytes in roots at control conditions. [B] Expression changes of transporters/channels associated with Na/K transport activity during salt treatments. [C] Selected cation transporters that showed a higher gene copy number in extremophytes and their expression during salt treatments. Nodes assigned with species colors show the ortholog network. Edges show homology relationships, either co-linear reciprocal orthologs (cl-rc), co-linear unidirectional orthologs (cl-uni), transposed -unidirectional duplicates (tr-uni), or tandem duplicated-unidirectional paralogs (td-uni). RPKM: reads per kilobase of transcript per million reads mapped. Asterisks indicate significant difference between the salt treated samples and their respective controls ( $n = 3$ , at least 4 plants per replicate) at  $*p\text{-adj} \leq 0.05$  and  $**p\text{-adj} \leq 0.01$ . [D] Salt-induced changes in the expression of genes associated with the transport of nutrients altered in the ionome (identified in Figure 3C). Sample names are shown on the left indicating treatment concentrations (150 and 250 mM NaCl) and durations (3 and 24 hr).

## Coordinated responses to salt stress in roots

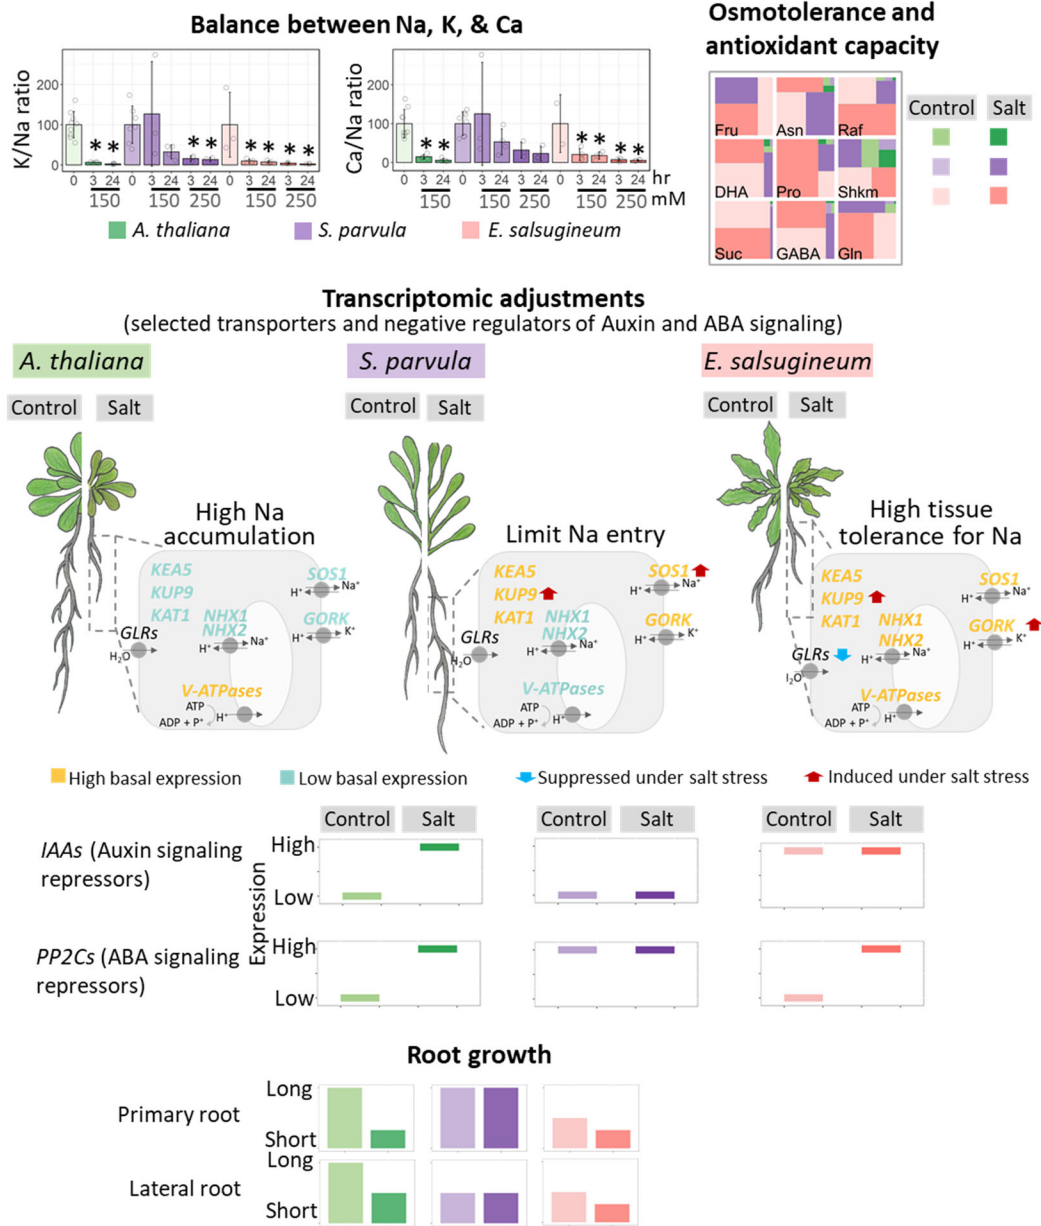

**Figure 7.** Focal responses to salt stress prevalent in roots of extremophytes compared to *A. thaliana* through ionomic, metabolomic and transcriptomic adjustments coupled to root growth. Ionomic balance is highlighted for Na, K, and Ca. Data are mean  $\pm$  SD ( $n \geq 4$ , at least 4 plants per replicate). Significant differences between treatment groups were determined by ANOVA with Tukey's test within species. Asterisks indicate significant difference ( $p \leq 0.05$ ) between the treated samples and their respective controls. Open circles indicate the biological replicates. Top 9 metabolites enriched in the extremophytes. Fru, fructose; Asn, asparagine; Raf, raffinose; DHA, dehydroascorbic acid; Pro, proline; Shkm, shikimic acid; Suc, sucrose; GABA, gamma-aminobutyric acid; Gln, glutamine. Relative expression changes associated with ion transport and stress signaling. *KEA5*, K efflux antiporter 5; *KUP9*, K uptake permease 9; *KAT1*, K channel in *Arabidopsis thaliana* 1; *GLRs*, glutamate-like receptors; *NHX1/2*, Na/H exchanger1/2; *V-ATPases*, vacuoles-ATPases; *SOS1*, salt overly sensitive 1; *GORK*, gated outwardly-rectifying K channel. Relative root growth compared to control root growth in *A. thaliana*.

**Table 1.** Cellular processes enriched among ortholog clusters identified based on their basal expression levels in shoots (S) and roots (R) of *S. parvula* (purple), *E. salsugineum* (red), and *A. thaliana* (green).

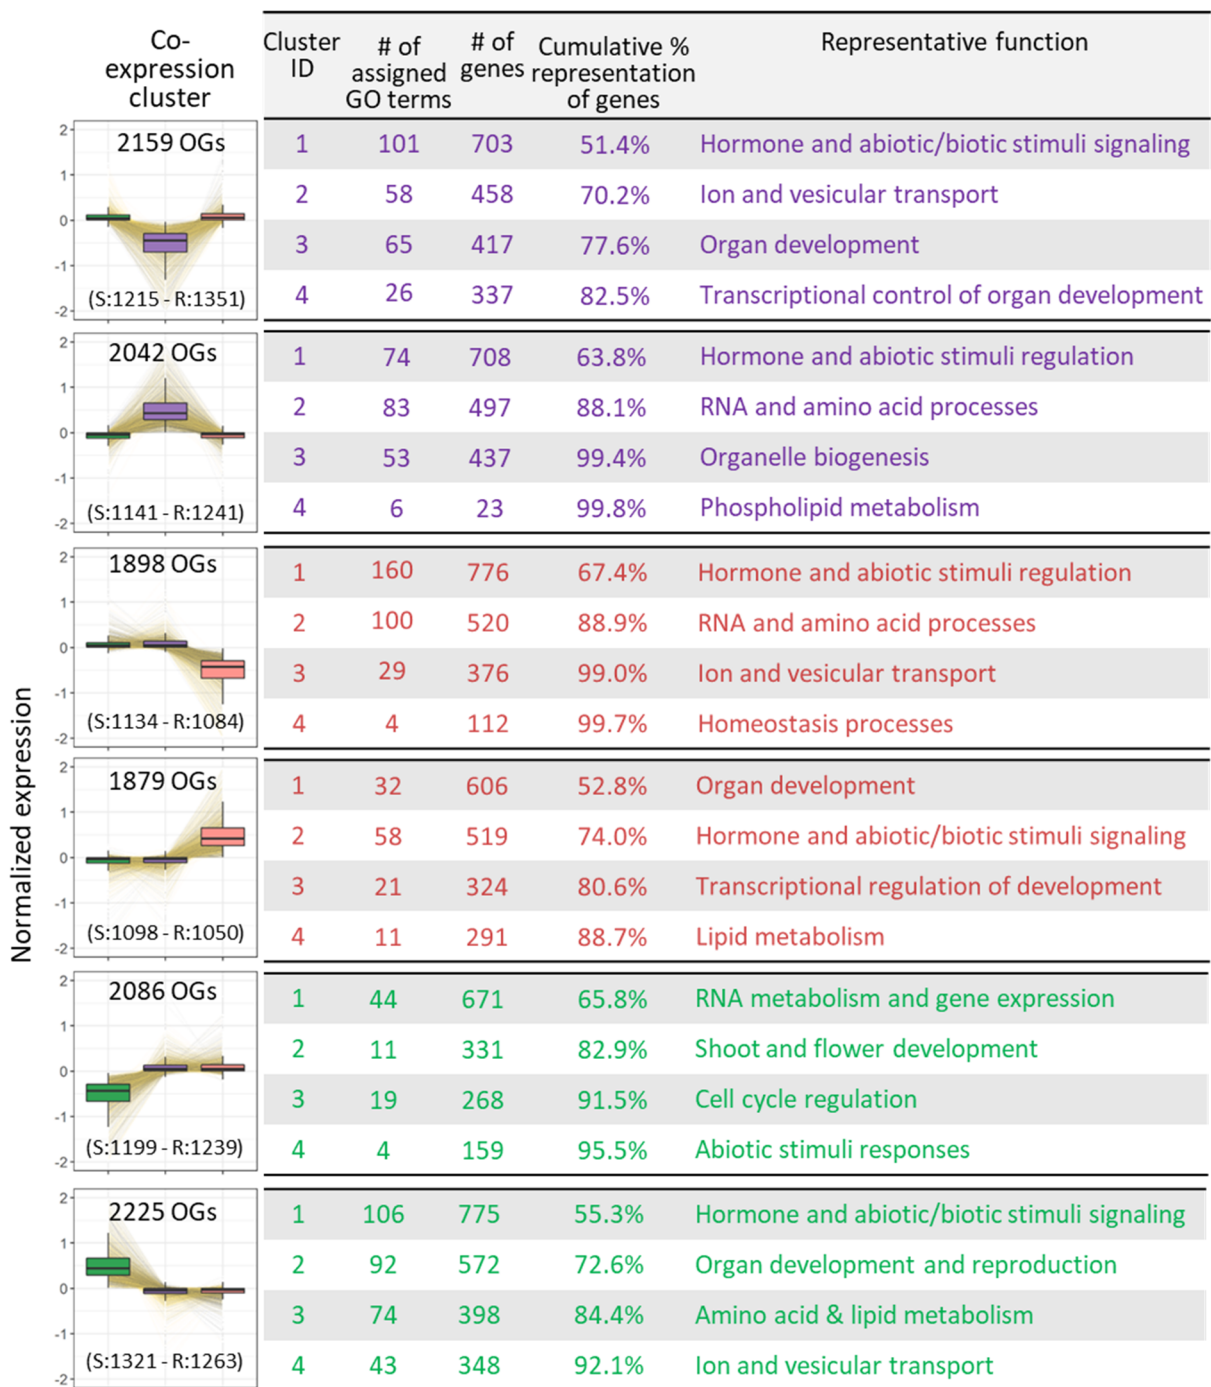

1080 **Supplementary figures**

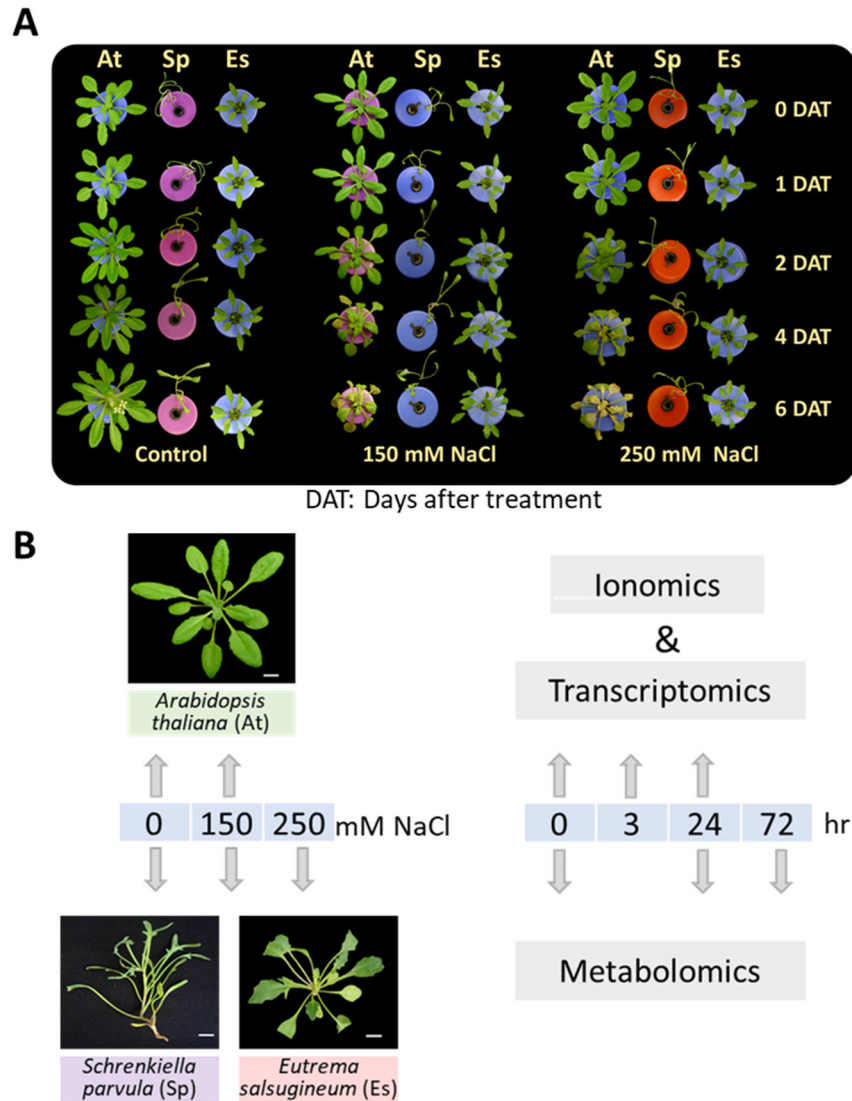

**Figure S1.** Effect of salt stress on *Schrenkiella parvula* (Sp), *Eutrema salsugineum* (Es), and *Arabidopsis thaliana* (At). [A] Four-week-old hydroponically grown plants and the salt concentrations examined in this study. DAT: Days after treatment. [B] Sampling scheme for ionomic, metabolomic, and transcriptomic profiling. There were at least 4 replicates per condition used for ionomic and metabolomic profiling, and 3 replicates per condition for transcriptomic profiling with at least 4 plants included per replicate.

1081

1082

1083

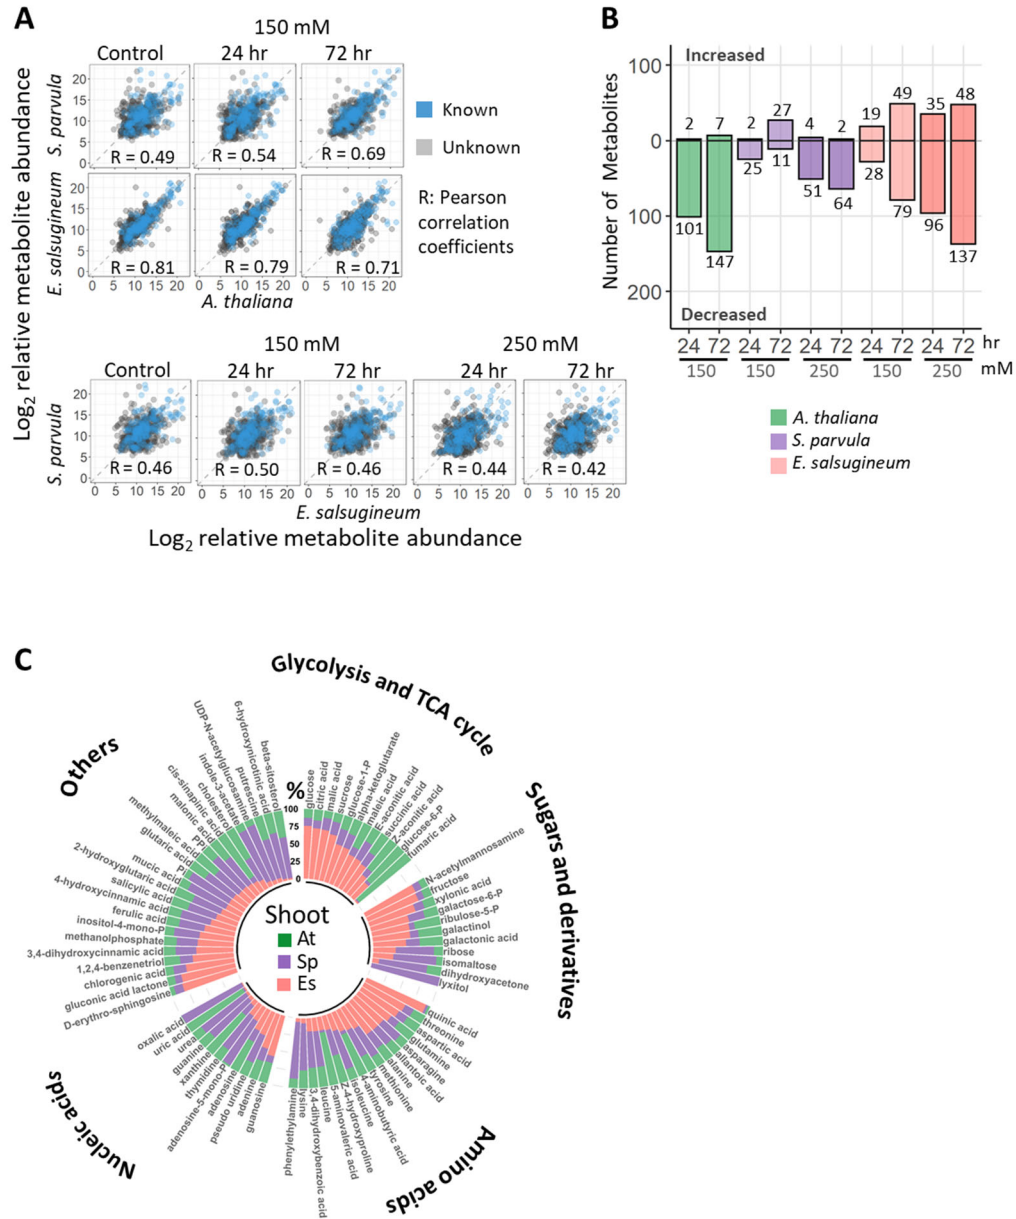

**Figure S2.** Overall metabolic adjustments in the shoots of the extremophytes compared to *A. thaliana*. [A] Pairwise Pearson correlations of the abundance of 716 quantified metabolites across all conditions and species. Blue dots indicate 182 metabolites with known structures, and grey dots represent 534 unknown metabolites. [B] Number of metabolites that significantly changed in abundance (DAMs) in each species compared to its respective control. [C] Basal level percent abundances of sugars, amino acids, and their derivatives in the three species. Significant differences were determined by one-way ANOVA with post-hoc Tukey's test at  $p \leq 0.05$  ( $n = 4$ , at least 4 plants per replicate).

1084

1085

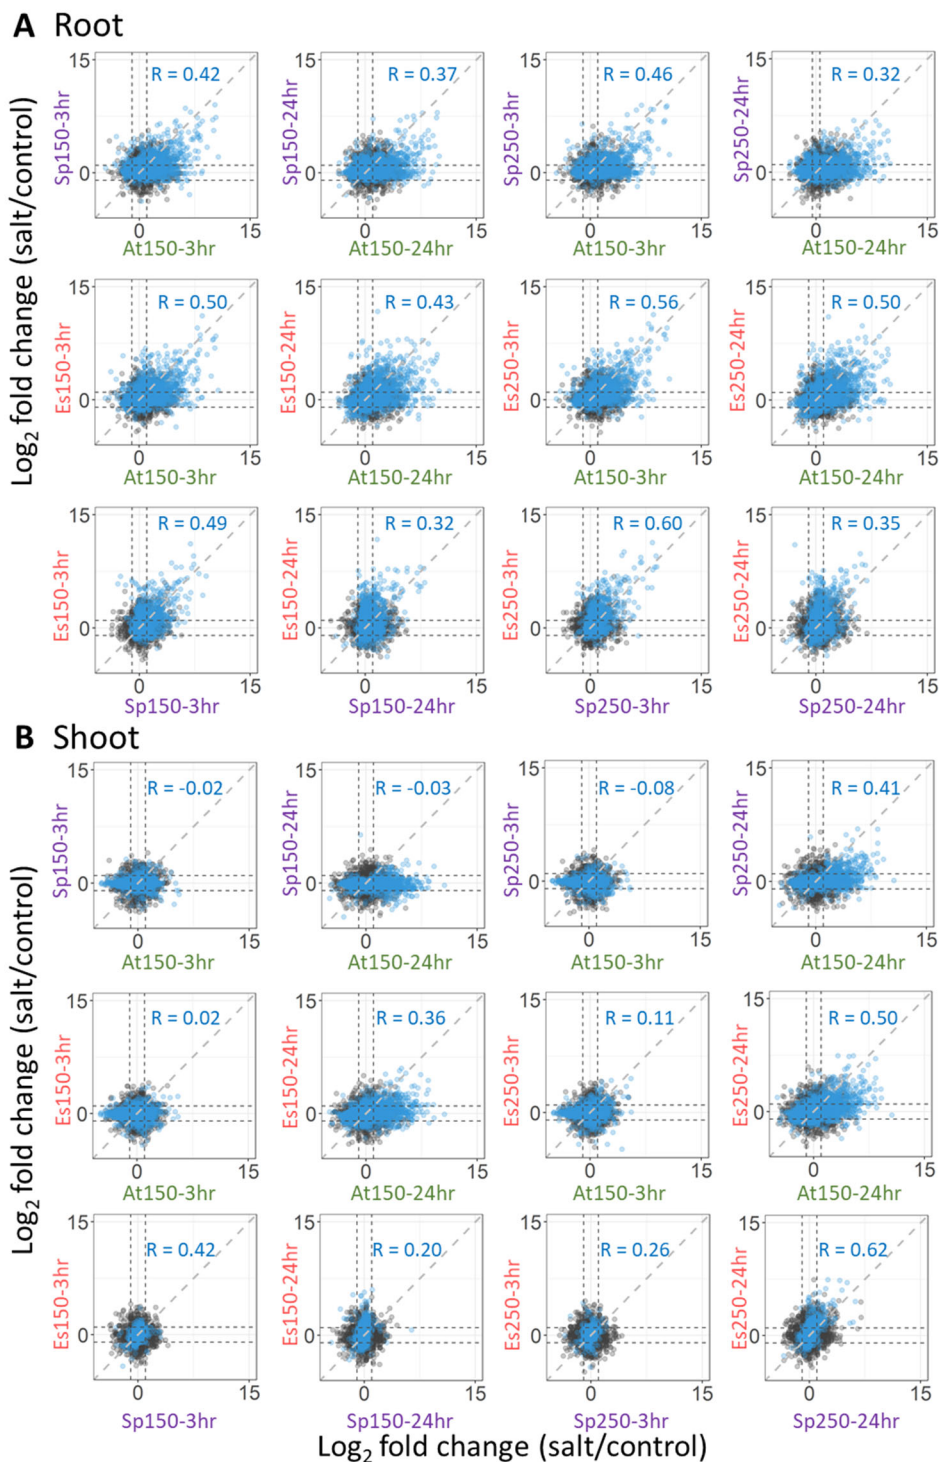

**Figure S3.** Pairwise comparison of transcriptomes of *Schrenkiella parvula*, *Eutrema salsaugineum*, and *Arabidopsis thaliana* during response to salt treatments. Pearson correlations of [A] root and [B] shoot transcriptomes were calculated using differentially expressed ortholog pairs which included DEGs from at least one condition in one species. The axis labels are composed of species, treatment concentrations, and treatment durations. Axis color codes represent *S. parvula* (Sp) in purple, *E. salsaugineum* (Es) in red, and *A. thaliana* (At) in green. Treatment concentrations include 150 and 250 mM NaCl; treatment durations include 3 and 24 hr.



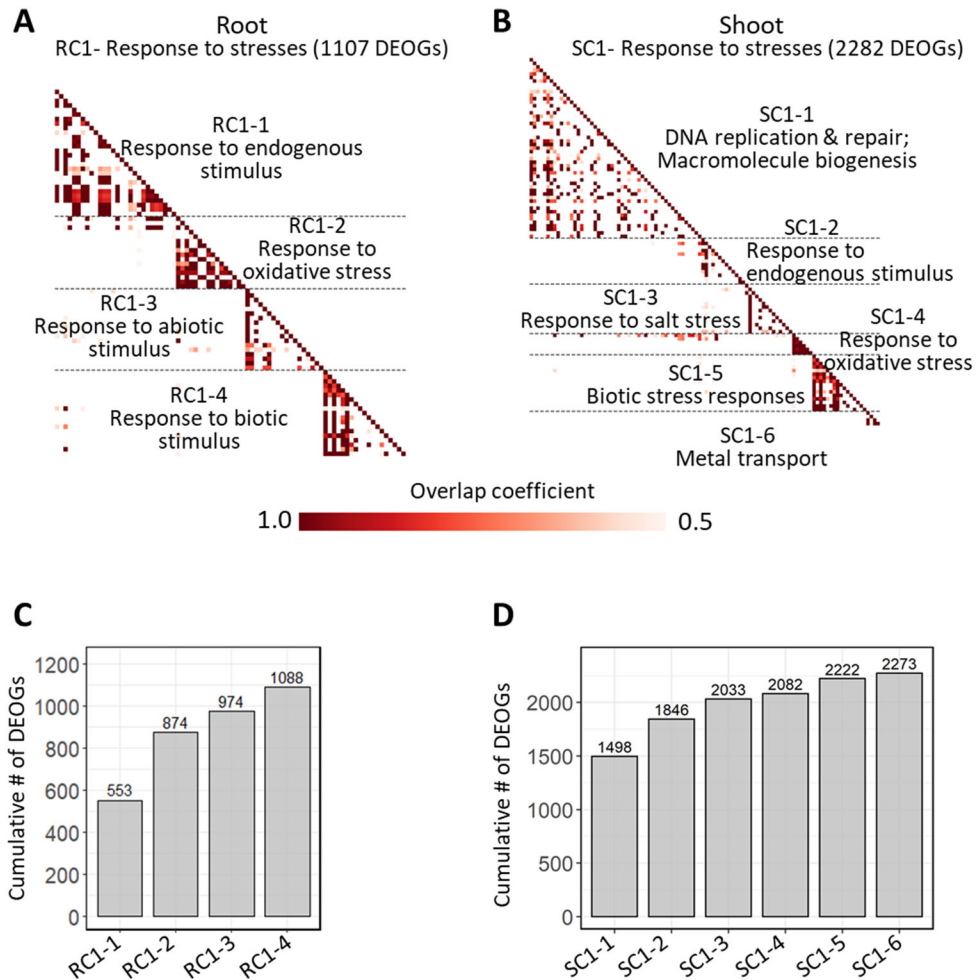

**Figure S4.** Functional processes in subclusters of the largest functional cluster (response to stresses) shown in Figure 3C. [A] Root RC1 cluster and its sub-clusters. [B] Shoot SC1 cluster and its sub-clusters. Similarity between functional clusters are based on overlap coefficient determined using GOMCL. Cumulative gene representation for sub-clusters in RC1 and SC1 for [C] roots and [D] shoots. Differentially expressed ortholog groups (DEOGs) are counted for cumulative representation in each sub-cluster. RC: root cluster; SC: shoot cluster.

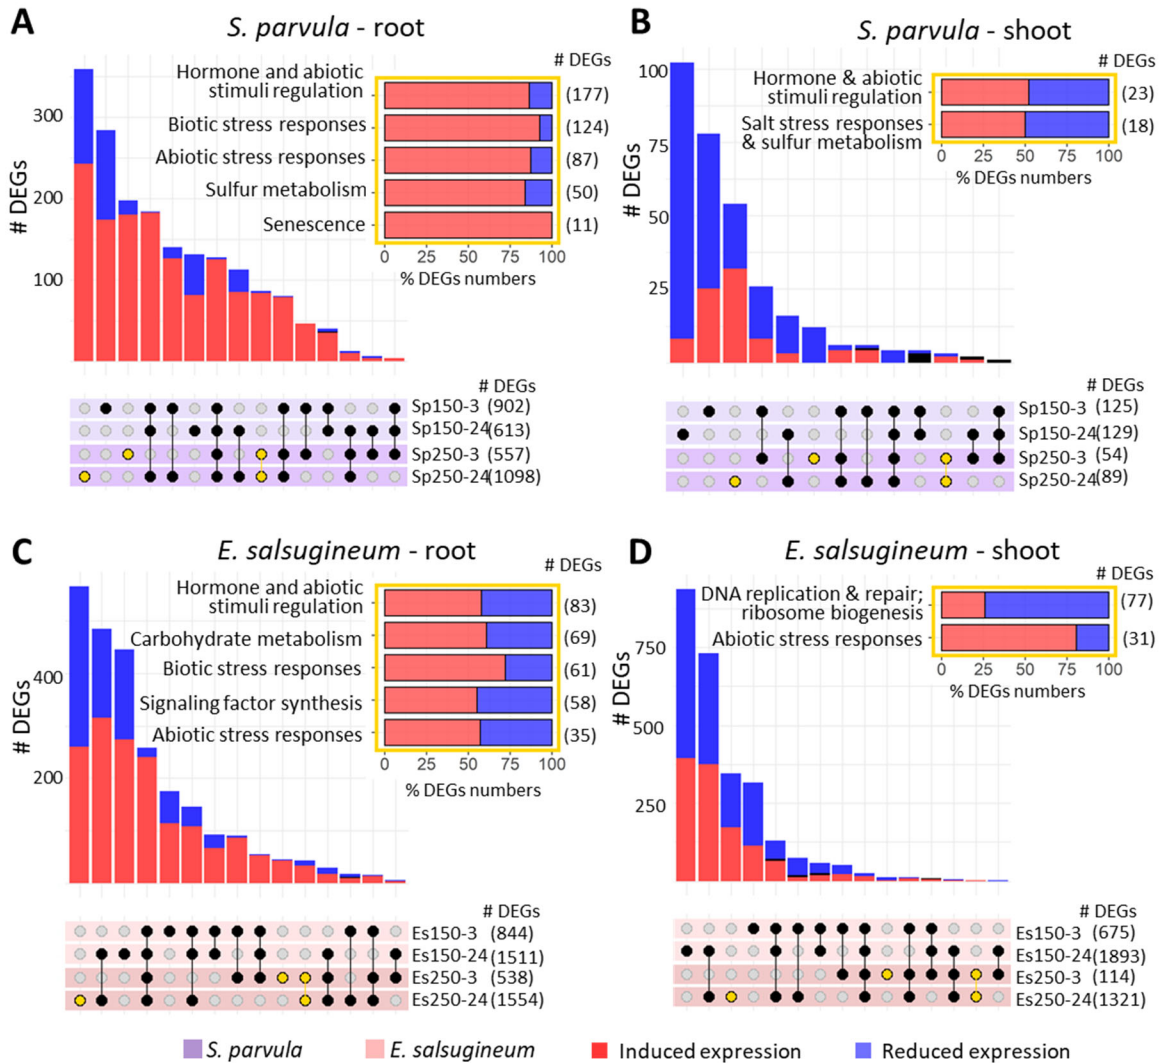

**Figure S5.** Species dependent responses to salt treatments in *Schrenkiella parvula* and *Eutrema salsugineum*. Differentially expressed genes (DEGs) in *S. parvula* [A] root and [B] shoot and *E. salsugineum* [C] root and [D] shoot in response to 150 and 250 mM NaCl stress at 3 and 24 hr. Yellow points in each panel show DEGs that were uniquely differentially expressed at 250 mM NaCl treatments. Functionally enriched processes for these unique DEGs are shown in the horizontal bar graphs given as insets outlined in yellow for each panel. Differentially expressed genes were identified at  $p\text{-adj} \leq 0.01$  ( $n = 3$ , at least 4 plants per replicate).

1088

1089

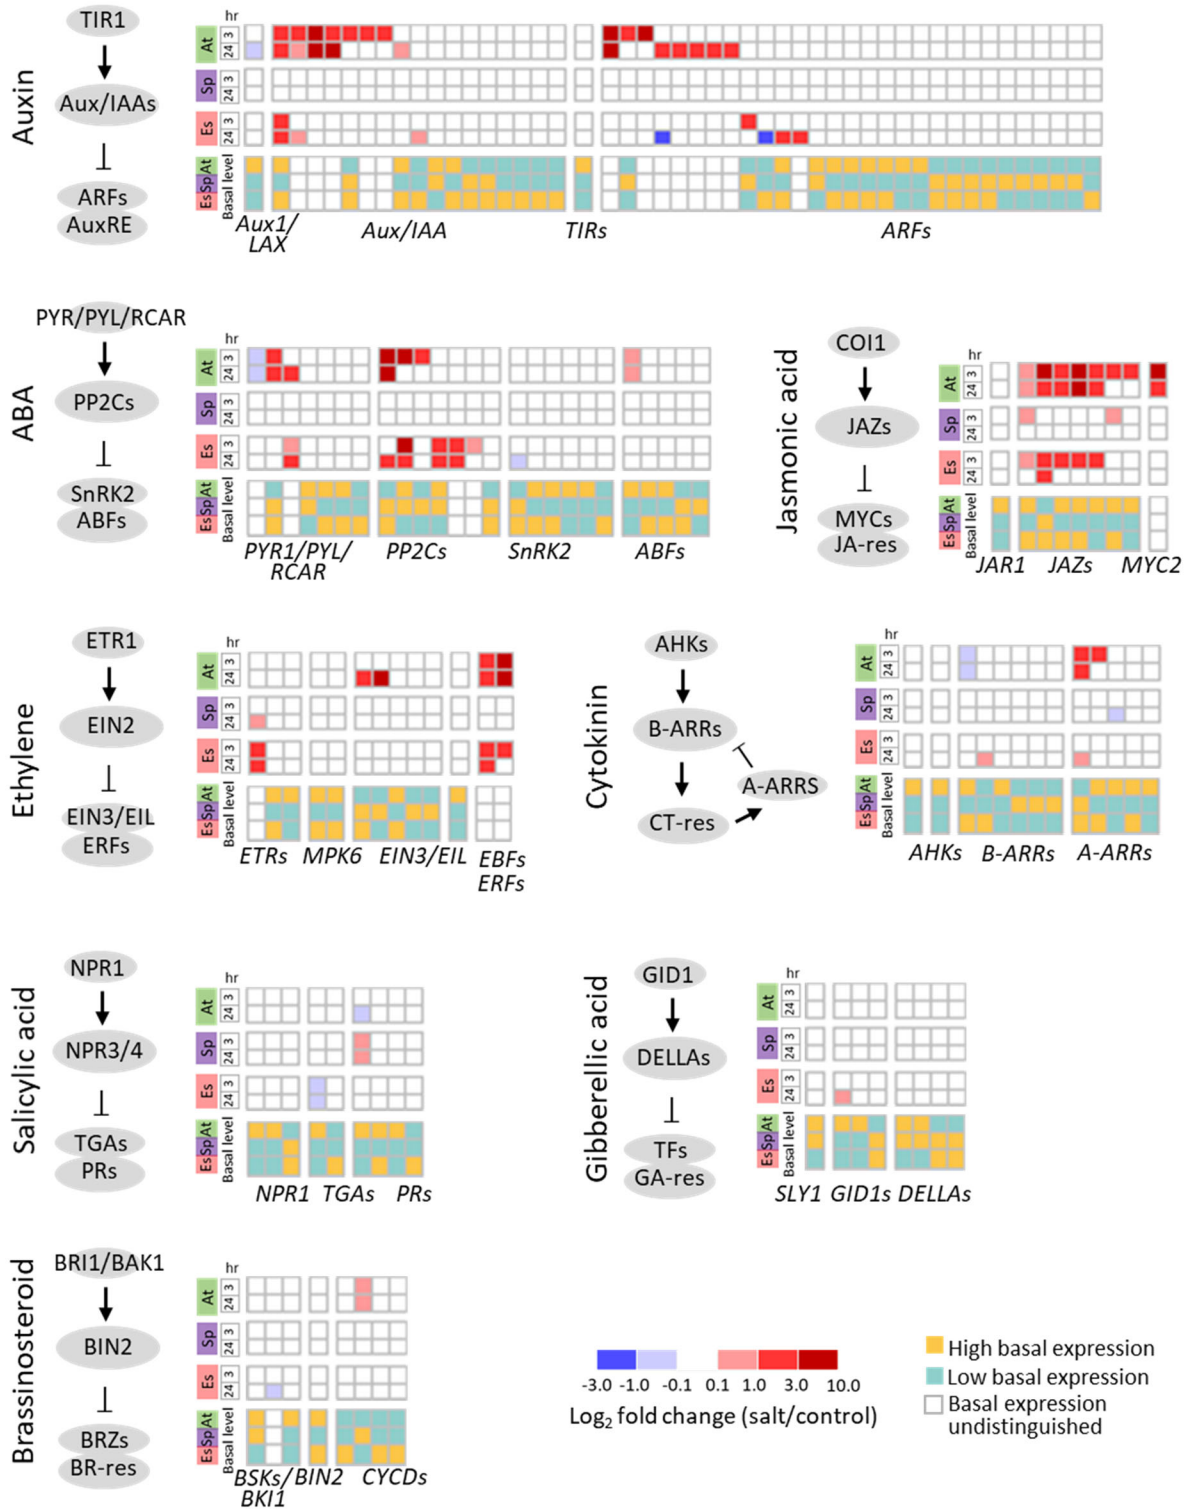

**Figure S6.** Expression of orthologs associated with hormonal signaling pathways in response to salt in *Arabidopsis thaliana* (At), *Schrenkiella parvula* (Sp), and *Eutrema salsugineum* (Es). Genes were selected based on their KEGG annotations. Only genes that were significantly different at either basal expression among species or under salt treatments compared to the control are shown.

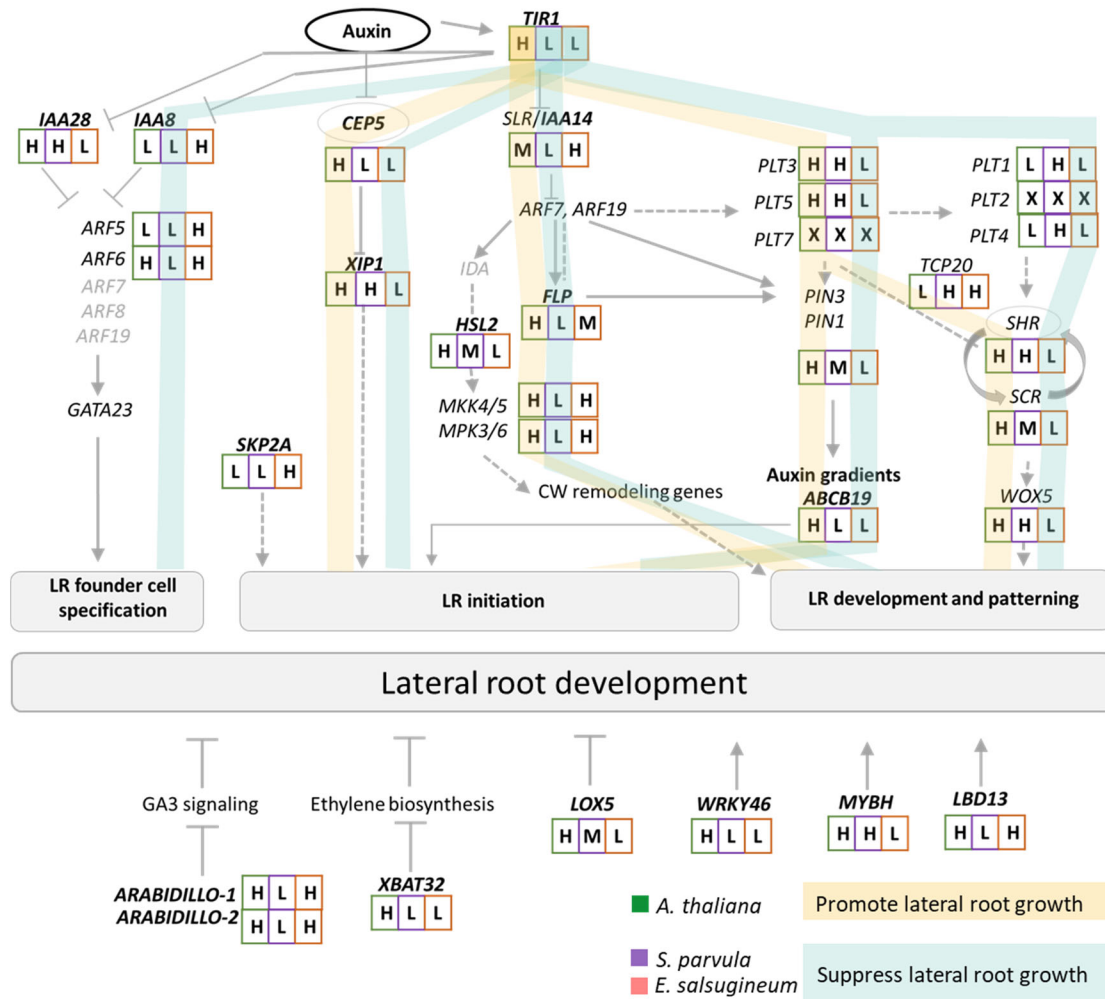

**Figure S7.** Lateral root development gene network adapted from De Rybel et al., 2010<sup>32</sup> and Banda et al., 2019<sup>33</sup>. The expression levels of orthologs (in black) were represented as high (H), medium (M), or low (L) relative to each other at basal expression in each ortholog group. Regulatory pathways that were consistently modulated in *S. parvula* or *E. salsugineum* implied to inhibit lateral root formation are marked in turquoise ribbons. Expression pathway leading to the induction of lateral root formation in *A. thaliana* is highlighted in gold ribbons. Genes in the network that were not differently expressed among the three species are marked in light grey.

1091

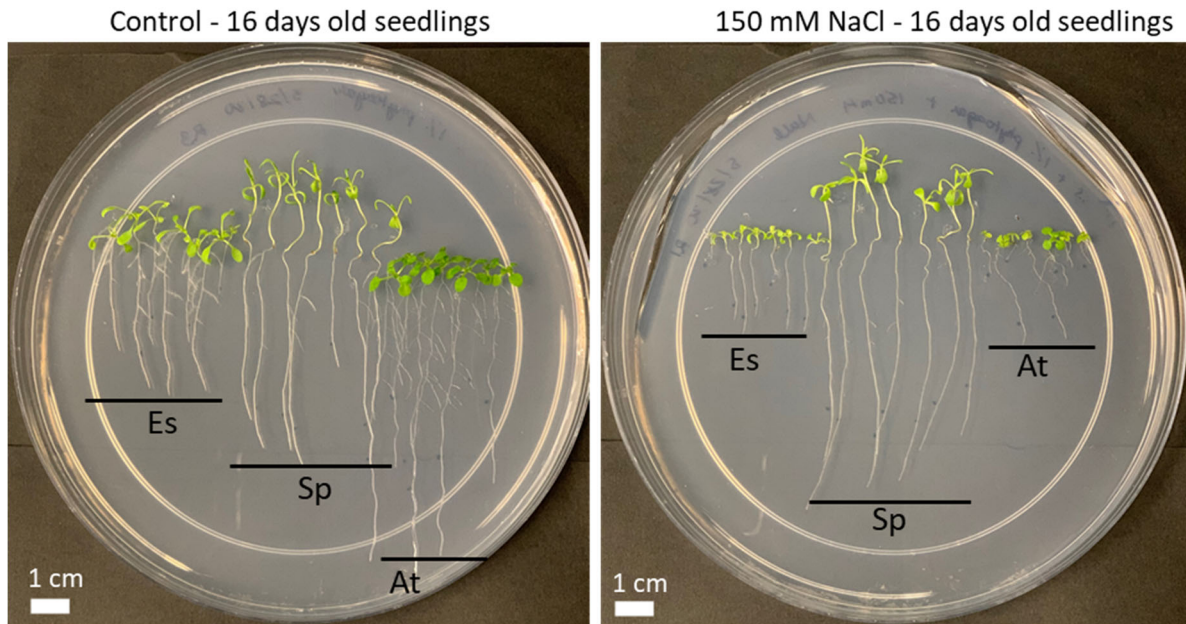

**Figure S8.** *Eutrema salsugineum*, *Schrenkiella parvula*, and *Arabidopsis thaliana* seedlings treated with 150 mM NaCl for 11 days. *Schrenkiella parvula* (Sp) promoted uninterrupted primary root growth while *E. salsugineum* (Es) showed slower primary root growth with reduced lateral root number. *A. thaliana* (At) roots showed severe primary and lateral root growth inhibition under salt stress.

1092

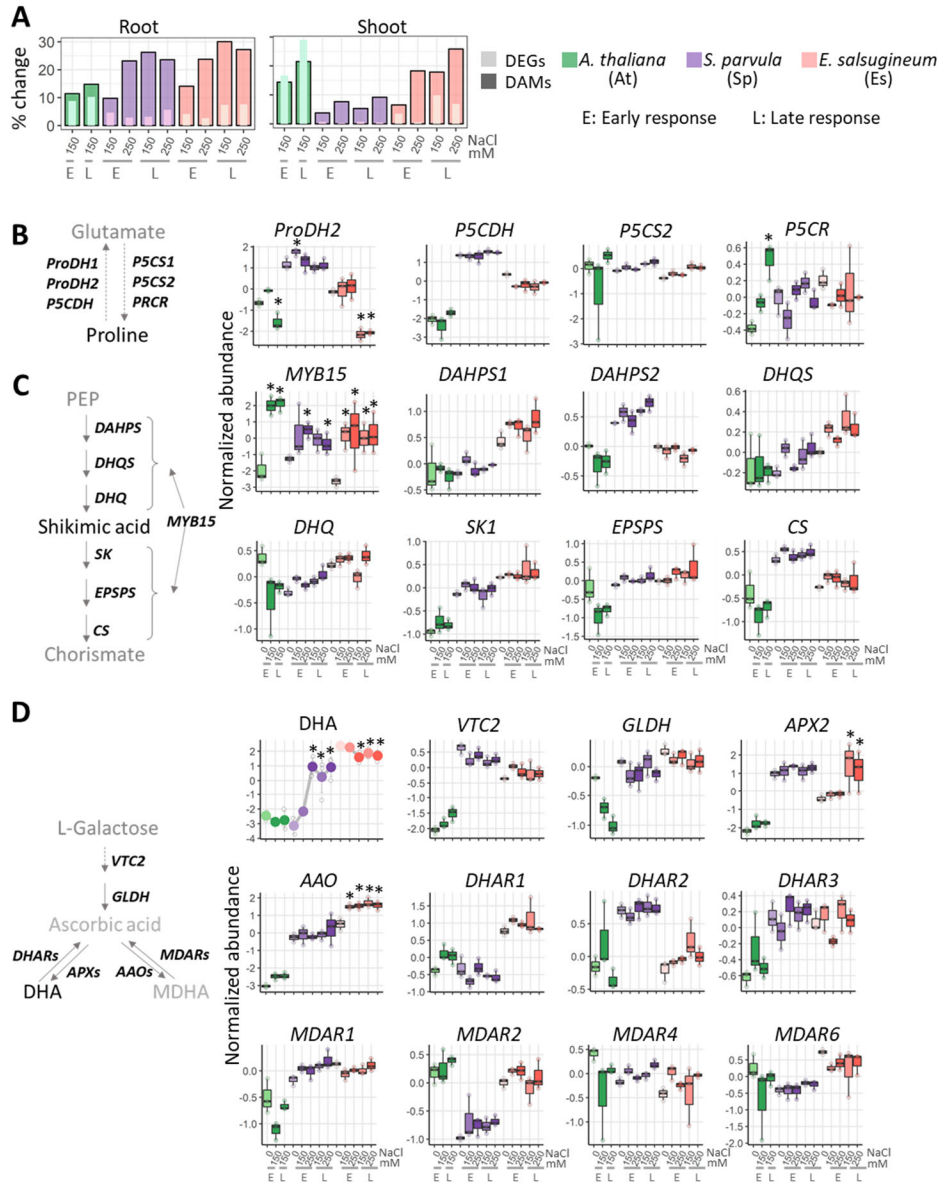

**Figure S9.** Overall concordant metabolomic and transcriptomic responses and proline, shikimic acid, and ascorbic acid pathway alignments between genes and metabolites. [A] Percentage of differentially expressed genes (DEGs) and differently abundant metabolites (DAMs) in response to salt treatments. Pathways involved in [B] proline metabolism, [C] the conversion from phosphoenolpyruvate to chorismite, and [D] ascorbic acid metabolism. Line graphs represent normalized log<sub>2</sub> relative metabolite abundance. Boxplots represent normalized gene expression values. Center line in the boxplots indicate median; box indicates interquartile range (IQR); whiskers show 1.5 × IQR. Asterisks indicate significant difference between the treated samples and their respective controls (n = 3-4). Early (E) and late (L) responses for transcripts refer to 3 and 24 hr, respectively. E and L responses for metabolites refer to 24 and 72 hr, respectively. Metabolites are shown in the backbone of the pathway while genes encoding for key enzymes/transcription factors are placed next to the arrows. Metabolites that were quantified in the current study are given in black while those not quantified are in grey.
